# Supplementary material for: Single-Cell Immune Profiling and Machine Learning Reveal a Predictive Immune Signature for Immunotherapy Response in NSCLC
Source: Research Square preprint supplement (doi:10.21203/rs.3.rs-8656976/v1), 2026-01-27
Supplement: Supplementary file 1 [file 17872e1143ce0f23a786011e.xlsx]

## Sheet: Results
CellSubset	ChannelName	MaxFc	P.Value	adj.P.Val	R_vs_NR	IDP0019	IDP0032	IDP0035	IDP0038	IDP0047	IDP0050	IDP0064	IDP0074	IDP0086	IDP0101	IDP0117	IDP0028	IDP0033	IDP0043	IDP0051	IDP0057	IDP0073	IDP0096	IDP0097	IDP0098	IDP0111
CD4+ T Cell (EMRA)	HLA_DR	1.25019	0.00233622	0.63458	1.25019	3.4035	2.47427	1.36173	3.36542	2.41013	1.7112	3.06477	4.18162	1.401	1.33706	3.45046	4.16919	3.95393	4.37279	2.21549	4.07832	4.08426	3.74469	3.7203	3.15257	4.6114
CD4+ T Cell (EMRA)	IgD	0.366328	0.00524766	0.63458	0.366328	0.712474	0.790321	0.458205	0.5415	0.494291	0.652069	0.570018	1.10572	0.551143	0.639567	0.771361	0.990518	0.871971	1.06684	0.479984	1.02	0.900165	1.3508	1.04105	0.958765	1.60744
CD4+ T Cell (EMRA)	CTLA_4	0.588398	0.0071978	0.63458	0.588398	1.48053	1.27219	0.79363	0.907178	1.13431	1.27472	0.548576	1.64435	1.34986	1.46137	1.31064	2.05674	1.7015	1.85922	0.853826	1.48786	2.09687	1.61434	2.84066	1.13047	2.2219
CD4+ T Cell (EMRA)	CD123	0.845279	0.00789871	0.63458	0.845279	1.37587	0.586664	0.663389	0.578523	0.778453	0.566588	0.952912	2.33043	0.954436	0.864742	1.87381	1.92367	1.48202	1.55616	0.660863	3.17347	2.9253	1.78583	1.56012	1.25531	2.60807
CD4+ T Cell (EMRA)	CD11c	1.62855	0.011252	0.63458	1.62855	4.36647	2.29342	0.926099	0.84867	3.51826	2.4131	1.20646	4.84777	2.92301	1.07301	4.50936	4.94187	4.75824	4.70116	0.775461	4.90749	4.73842	4.22243	4.35162	3.76785	5.41702
CD4+ T Cell (Central Memory)	HLA_DR	0.401375	0.0193334	0.63458	0.401375	1.6715	1.63679	1.46284	1.75442	1.70374	0.786079	1.49844	1.83474	1.4658	1.82142	2.47729	2.55587	1.96471	1.89016	2.07741	1.90259	1.85277	2.55002	1.88061	1.65979	2.14623
gd T Cell	CTLA_4	0.465693	0.0250133	0.63458	0.465693	1.10994	1.02004	0.776389	0.62238	1.03808	0.875294	0.582514	1.21753	0.958762	1.19812	0.904241	0.95459	0.987939	1.63569	0.89147	1.36383	1.22057	1.86284	2.82703	0.819175	1.46044
CD8+ T Cell (Effector Memory)	CTLA_4	0.283309	0.0252944	0.63458	0.283309	0.966404	0.94577	0.815861	0.74608	0.92413	1.33608	0.590037	0.948614	1.33334	1.14363	0.698395	1.5133	1.12391	1.41216	1.21577	1.14044	1.27847	1.24323	1.29754	0.646716	1.46003
CD4+ T Cell (Effector Memory)	CTLA_4	0.359131	0.0273616	0.63458	0.359131	1.53796	1.37231	1.07696	1.4614	1.29891	1.38953	1.03699	1.49124	2.0033	1.64776	1.55022	2.50331	1.6562	1.69322	1.47413	1.32665	1.83972	1.65041	2.25716	1.38967	2.22501
CD4+ T Cell (EMRA)	CCR4	1.09546	0.027904	0.63458	1.09546	3.52676	2.75765	0.840717	0.762767	1.26668	3.72683	1.80844	4.46537	1.87523	3.7474	2.29093	3.34131	3.68831	5.29134	1.76694	3.6074	3.97975	3.35511	2.85928	3.37126	4.30186
gd T Cell	CD25	0.680878	0.0283081	0.63458	0.680878	0.770748	1.35262	0.976774	0.611211	0.830649	1.06048	0.73586	1.63178	1.46727	1.79264	0.779338	0.702943	1.16895	2.19342	1.18493	1.78324	2.49083	3.40277	2.74244	0.80989	1.24697
CD4+ T Cell (Central Memory)	CTLA_4	0.271317	0.0289319	0.63458	0.271317	1.3556	1.25454	1.19648	1.40311	1.35185	1.14226	0.956803	1.46283	1.60568	1.64367	1.62842	1.84723	1.76114	1.6521	1.34608	1.33932	1.43284	1.51554	1.9374	1.45451	2.06448
CD4+ CD8+ T Cell	HLA_DR	0.621888	0.0301958	0.63458	0.621888	4.30186	2.76059	2.26579	4.14126	2.81596	2.53935	2.98064	3.79507	2.79142	3.14712	3.50804	4.01962	3.67331	3.0465	2.83156	4.43842	4.00086	3.65984	4.14106	3.488	4.7807
gd T Cell	CCR6	0.904731	0.0309037	0.63458	0.904731	2.58583	1.97683	2.69391	2.72382	2.53659	2.87803	2.69987	2.92669	3.8209	2.839	2.99418	3.04637	2.74705	3.36824	3.06062	2.97868	4.07918	5.64397	6.30542	2.43272	3.27202
CD4+ CD8+ T Cell	CD11c	1.2523	0.0316074	0.63458	1.2523	4.74174	1.46063	1.73195	1.4041	3.03295	2.50735	1.24934	3.54121	3.26735	1.75529	3.99204	4.35007	3.85121	1.4318	1.06869	4.73123	4.66243	4.29874	5.00552	3.93252	5.26716
CD8+ T Cell (Central Memory)	CTLA_4	0.298294	0.0401538	0.651822	0.298294	1.05371	0.93055	0.830149	0.735279	1.01015	1.11033	1.01069	1.02145	1.36249	1.23209	0.96605	1.50819	1.19212	1.36419	1.01789	1.19443	1.13101	1.2899	2.20033	0.753708	1.57019
gd T Cell	CD123	0.539682	0.0440321	0.651822	0.539682	1.03711	0.522711	0.712894	0.681521	0.641281	0.670497	0.663068	0.66416	1.37463	0.832602	1.07354	0.779645	0.505949	3.21541	0.602907	1.4356	1.2078	1.94254	1.83805	0.760128	1.17606
CD8+ T Cell (EMRA)	CTLA_4	0.214481	0.0441062	0.651822	0.214481	1.09234	0.899455	0.612597	0.642501	0.821117	0.798362	0.440334	0.742044	0.784879	0.951709	0.765295	1.10161	0.87064	1.15618	0.674267	0.995464	0.855815	1.05001	1.26306	0.718506	1.23256
gd T Cell	IgD	0.252021	0.0462078	0.651822	0.252021	0.688599	0.860936	0.56975	0.57452	0.600815	0.638463	0.578978	0.82425	0.739513	0.81991	0.791589	0.505612	0.60369	1.15523	0.626945	0.819623	0.959744	1.60024	1.2275	0.862774	1.14733
CD4+ CD8+ T Cell	CTLA_4	0.351633	0.0466182	0.651822	0.351633	1.4343	1.41108	0.942297	1.27031	1.5747	1.33601	0.870589	1.71158	1.76826	1.82495	1.65404	1.76331	1.6715	1.99558	1.28349	1.56559	1.54666	1.76016	2.74001	1.36153	2.19042
CD4+ T Cell (Naive)	CD57	-1.31642	0.0533924	0.681881	-1.31642	2.97925	1.37368	7.57452	2.63705	5.75687	1.71676	2.30678	2.95011	1.73489	1.73012	6.05107	1.6794	1.591	1.73395	2.1702	1.77324	1.5978	2.68481	2.39837	2.11202	2.55963
CD4+ CD8+ T Cell	IgD	0.230458	0.054787	0.681881	0.230458	0.982708	1.05635	0.601115	0.898155	0.722235	0.876024	0.668134	1.05379	0.771481	0.972081	0.997751	0.872937	0.870155	0.962427	0.733963	1.20914	0.94152	1.4976	1.28878	1.04354	1.61164
CD8+ T Cell (Naive)	CTLA_4	0.393881	0.054864	0.681881	0.393881	1.10955	0.863607	0.832891	0.842614	1.05916	0.800709	0.8301	1.13021	1.18868	1.10994	1.16409	1.39468	0.959803	1.32803	1.09241	1.20786	1.1163	1.31055	3.07208	0.846745	1.54812
CD4+ T Cell (EMRA)	TCRgd	0.219908	0.0603187	0.696382	0.219908	0.590504	0.464598	0.425681	0.52327	0.486544	0.639157	0.407957	0.921932	0.583427	0.602388	0.901863	0.684533	0.848361	0.651189	0.424993	0.684744	0.488868	1.16646	1.11943	1.0091	1.07351
CD8+ T Cell (Effector Memory)	CD25	0.413857	0.0615075	0.696382	0.413857	0.695588	0.883694	1.5888	0.377491	0.742592	1.22741	0.82481	1.55596	1.38341	2.09818	0.504712	1.47747	1.38814	2.12947	1.71547	1.4565	1.88274	1.86023	0.698193	0.966998	1.36577
CD4+ T Cell (EMRA)	CD25	0.412413	0.0657067	0.696382	0.412413	1.83972	2.02279	0.64945	0.496127	0.703365	1.70823	0.699117	1.78092	1.01466	1.59517	0.891528	1.75957	2.06416	2.14591	0.937544	1.81204	1.8344	1.52478	1.53189	1.05162	1.64503
CD4+ T Cell (EMRA)	CD38	0.667816	0.0709137	0.696382	0.667816	3.79509	2.71691	1.67711	4.06209	3.04776	4.2195	2.66125	4.25645	3.61555	4.03054	3.68897	5.02812	4.79851	4.48395	1.90331	4.30429	3.89663	4.12321	4.25843	3.66892	4.55024
CD4+ T Cell (Treg)	CD11c	0.959586	0.0731856	0.696382	0.959586	4.02991	0.803161	0.812355	0.648669	1.42937	1.05927	0.817909	1.2586	2.8673	1.01208	3.83816	3.57791	1.54191	0.984032	0.699813	3.40467	3.13253	3.74353	3.44595	2.19833	3.75516
CD8+ T Cell (EMRA)	CCR4	0.625312	0.0793756	0.698327	0.625312	1.39729	0.75513	1.48263	0.822578	1.04076	1.54245	0.954689	2.06241	1.55167	3.47991	1.33622	1.10782	1.6343	3.74346	2.63607	1.89393	1.12496	2.51159	1.28267	2.89493	2.35589
CD8+ T Cell (EMRA)	CD294	0.294326	0.0812375	0.706766	0.294326	1.4149	1.04627	1.2689	1.19607	1.07906	1.01644	1.10424	1.19734	1.47441	1.72573	1.82887	1.12239	1.00746	2.10898	1.70068	1.57542	1.19867	1.63703	1.62133	2.43503	1.58377
CD4+ T Cell (EMRA)	CD28	0.407767	0.0862715	0.719382	0.407767	4.89961	4.67273	3.00769	4.04933	3.85234	4.57619	3.66798	4.69711	4.02909	5.17579	4.318	4.60221	4.99016	5.22624	4.30919	4.77025	4.63055	4.86783	4.64466	3.78619	4.92845
gd T Cell	CXCR5	0.277651	0.0867294	0.719382	0.277651	0.844658	0.888599	0.725429	0.477151	0.655845	0.768982	0.439046	1.21913	0.990314	1.35761	1.1085	0.480554	0.797374	1.60094	0.724251	1.11875	0.962639	1.68325	1.43826	1.29678	1.28759
CD8+ T Cell (Naive)	CD25	0.326682	0.0922482	0.719382	0.326682	0.564824	0.638461	1.5594	0.712044	0.890288	0.7854	1.00586	1.68191	1.06474	1.54901	0.831194	1.44923	0.711817	1.87935	1.73788	1.24918	1.61943	1.25639	1.96147	0.80933	0.850131
CD4+ T Cell (EMRA)	CD27	0.939655	0.092285	0.719382	0.939655	4.61023	4.13392	0.876932	0.784832	2.61943	4.73712	2.80457	4.98882	4.88385	5.49959	2.23676	4.19905	4.94904	4.65973	3.7755	4.86062	3.97273	4.88967	3.30073	4.40139	5.0936
CD4+ CD8+ T Cell	CD123	0.580928	0.0940079	0.719382	0.580928	3.66814	0.897207	0.935754	0.901139	1.00484	0.888192	0.840266	1.20393	1.21526	1.24706	1.39389	1.94073	0.98416	1.02243	0.925624	2.10726	3.39727	1.99176	2.19572	1.64986	2.49961
CD4+ CD8+ T Cell	CD294	0.359241	0.096678	0.721731	0.359241	2.55689	1.7646	2.07564	1.62931	1.70101	2.98025	2.25581	2.68696	3.21424	2.6532	1.96959	3.14472	1.7693	2.41216	2.84871	2.71737	2.56607	2.69435	3.04306	3.06589	2.50124
CD8+ T Cell (Effector Memory)	CD123	0.161064	0.0986274	0.721731	0.161064	0.714868	0.681288	0.727331	0.501286	0.55276	0.628177	0.522528	0.618236	0.792267	0.898949	0.756915	0.745004	0.69808	0.738074	0.754047	0.684955	0.775361	1.34788	0.720456	1.04473	0.82442
CD4+ T Cell (Effector Memory)	CD11c	0.574146	0.100667	0.729832	0.574146	2.01131	0.664075	0.700928	0.561365	0.880373	0.747152	0.629637	0.841047	2.48422	0.868536	1.97746	2.60011	1.15062	0.902643	0.586806	2.07996	1.2654	3.45273	2.06529	0.79837	2.08145
CD4+ T Cell (Central Memory)	CD11c	0.61338	0.10662	0.749574	0.61338	1.76554	0.710401	0.714069	0.554416	0.896428	0.758318	0.581292	0.890855	2.51341	0.90057	2.86009	2.51074	1.30931	0.918004	0.629046	2.85541	1.21581	3.54937	2.22202	1.2569	1.61755
CD8+ T Cell (Central Memory)	CD25	0.258844	0.117594	0.757244	0.258844	1.05626	1.32083	1.79804	1.48591	1.251	1.79605	1.25943	1.75635	1.525	2.07897	0.728739	1.87921	1.65229	2.13108	1.95342	1.55196	1.97189	1.80414	1.73577	1.03025	1.47533
gd T Cell	CD45RO	0.29852	0.119195	0.757244	0.29852	2.30349	2.39881	2.92152	1.21216	2.25533	2.4272	2.14801	2.89424	2.30462	2.57248	1.75046	2.48756	2.6383	3.06812	2.57062	2.53532	2.30211	2.80338	2.73878	1.85962	2.87984
CD4+ CD8+ T Cell	CD57	-1.0264	0.120281	0.757244	-1.0264	7.21988	7.33989	8.10094	7.51146	8.04852	6.9332	7.43274	7.55507	6.87074	5.73278	8.2741	7.19649	6.97646	1.86033	7.74201	7.2568	7.50778	5.15405	7.87497	3.64498	8.17607
CD4- CD8- T Cell	CD45RO	0.228647	0.126927	0.768948	0.228647	2.07549	1.9739	2.54753	1.58261	1.74735	2.32696	2.41093	2.39395	2.12781	2.08044	2.02234	2.6479	2.68665	2.54349	2.34841	2.23723	1.88257	1.87498	2.3459	2.04084	2.85059
CD4+ T Cell (Central Memory)	CD38	0.372197	0.127373	0.768948	0.372197	2.85298	2.34939	3.24452	3.73898	2.70606	3.40067	2.24737	2.80951	3.41506	3.03594	3.51871	4.64941	3.95324	3.21111	2.6488	2.76086	3.50317	3.27098	3.21951	2.90771	3.88737
CD4+ T Cell (Treg)	CD123	0.212732	0.132722	0.769374	0.212732	0.954623	0.532438	0.54877	0.47322	0.531474	0.503978	0.551247	0.558406	0.923177	0.755824	1.19628	0.768829	0.58553	0.612713	0.547172	0.909202	0.79221	1.65377	1.282	0.80998	1.01086
gd T Cell	CD294	0.490923	0.136556	0.773321	0.490923	1.53523	1.19459	1.50286	1.2886	1.28641	1.30258	1.51524	1.57174	2.59418	1.99914	2.00527	1.15484	1.04408	2.68451	1.31533	1.75543	2.27637	3.81531	3.69923	1.42558	1.91659
CD4+ CD8+ T Cell	TCRgd	0.189213	0.141059	0.773321	0.189213	0.711841	0.791442	0.609236	0.817966	0.685381	0.82401	0.391757	0.756884	0.734836	0.913014	1.30991	0.771097	0.913131	0.730168	0.606626	0.765224	0.773874	1.482	1.33494	1.23504	1.04937
CD4+ T Cell (Naive)	CD38	0.315142	0.14633	0.773321	0.315142	3.85409	3.41402	4.84504	3.27881	3.70909	3.93467	3.28519	3.61717	3.62944	3.9126	4.03175	4.61794	4.90664	4.67619	3.58603	3.61721	3.75963	3.74967	4.09556	3.43651	4.44411
CD4+ T Cell (Treg)	CD294	0.310533	0.147802	0.773321	0.310533	1.24292	1.01715	1.03569	0.798719	0.906626	1.19245	0.770898	0.829173	1.30674	1.28567	1.31563	1.05407	1.20564	1.46175	0.950143	0.983942	1.06565	1.67132	3.1377	1.09822	1.11477
CD4+ T Cell (Naive)	CTLA_4	0.19821	0.151832	0.773321	0.19821	1.40507	1.09165	1.44862	0.8706	1.27928	1.00126	0.882105	1.45438	1.27145	1.37823	1.35374	1.36397	1.30351	1.51018	1.14846	1.26597	1.23865	1.44393	2.15533	0.953943	1.81306
CD8+ T Cell (Naive)	CD294	0.353305	0.15323	0.773321	0.353305	1.53053	1.4421	2.54725	1.55922	1.63591	1.4808	2.49573	2.55077	2.74279	2.1031	1.95067	2.34439	1.43604	2.279	2.74649	2.71322	2.13694	2.13575	3.66349	2.44326	1.66982
CD4+ CD8+ T Cell	CD25	0.237331	0.162135	0.773321	0.237331	1.70862	1.92872	1.4754	1.49054	1.90124	2.14768	1.08934	2.24692	1.77075	2.43124	1.44514	2.16005	1.98775	2.66733	1.97227	1.92688	2.18131	2.00469	2.00113	1.30044	2.022
CD4+ T Cell (Effector Memory)	HLA_DR	0.359192	0.16262	0.773321	0.359192	2.76915	2.21022	2.42999	4.16043	2.17422	1.99445	2.87614	2.80448	2.27061	2.671	2.96277	3.6789	3.9219	3.07228	2.9552	2.5054	3.27656	2.77682	3.03953	1.86947	3.15355
CD4+ T Cell (Central Memory)	CD123	0.161367	0.167215	0.773321	0.161367	0.575926	0.459488	0.468213	0.451762	0.468982	0.466243	0.407106	0.494352	0.755378	0.676075	0.785842	0.61708	0.531735	0.55759	0.477762	0.797857	0.550931	1.51499	0.59257	0.757874	0.678341
CD4+ CD8+ T Cell	CD38	0.366187	0.172128	0.773321	0.366187	4.04363	3.58425	3.12582	4.97348	3.67399	4.20329	2.24467	3.63935	3.84153	4.26627	4.13617	4.88362	4.66278	3.92233	3.21928	4.08287	4.11897	4.03726	4.485	3.66708	4.52126
gd T Cell	CD38	0.345287	0.17315	0.773321	0.345287	3.36964	3.01915	3.32368	4.38758	3.64312	3.716	2.80488	3.29204	3.76441	3.51121	4.00312	4.72556	3.23959	4.69679	3.03032	3.5671	4.57703	4.03908	4.03968	2.80271	4.0394
CD8+ T Cell (Effector Memory)	CCR4	0.569461	0.174962	0.773321	0.569461	1.81832	1.57038	3.49885	0.959183	1.81138	3.52287	2.97025	3.66838	3.33931	4.37529	1.6225	2.86061	2.79523	4.46771	3.86021	3.07037	3.12975	3.91699	1.672	2.80186	3.62597
CD4+ T Cell (Treg)	CD56_NCAM	0.157852	0.177418	0.773321	0.157852	1.03783	0.508784	0.758839	0.482142	0.60172	0.829604	0.615518	0.60854	0.722564	0.626764	1.21271	0.892508	0.865213	0.547449	0.689034	0.777219	0.609504	1.23998	1.18208	1.05061	1.00221
CD8+ T Cell (Central Memory)	CD123	0.14893	0.179482	0.773321	0.14893	0.693255	0.673513	0.674637	0.869995	0.564826	0.624546	0.445407	0.624577	0.823364	0.850416	0.966309	0.678349	0.675071	0.715209	0.640007	0.725134	0.722192	1.46485	1.02128	1.09696	0.851021
CD8+ T Cell (EMRA)	CD25	0.204134	0.184279	0.773321	0.204134	0.773955	0.564398	0.785608	0.439111	0.650932	0.633026	0.574168	0.837109	0.564293	1.6589	0.638905	0.658729	1.02048	1.80321	0.989137	0.888407	0.666281	0.950787	0.7278	0.939525	0.77916
CD8+ T Cell (Effector Memory)	CD294	0.451684	0.185108	0.773321	0.451684	1.00946	0.702622	2.60164	0.682798	0.752025	1.97848	2.08256	2.30175	3.08192	2.50808	1.5774	2.67925	0.949319	2.09349	2.76163	2.61854	2.3933	2.66858	1.02003	2.87044	1.98839
gd T Cell	HLA_DR	0.29949	0.185676	0.773321	0.29949	3.11074	2.67812	2.57381	3.28498	2.48196	2.01073	2.8283	2.93625	1.94879	2.94146	3.02388	2.86759	2.60593	4.26453	2.60106	2.83432	3.48179	3.12878	2.837	2.1344	3.34773
CD4+ T Cell (Effector Memory)	TCRgd	0.128075	0.193511	0.780889	0.128075	0.483752	0.400681	0.393792	0.482312	0.360664	0.390428	0.325683	0.347508	0.541739	0.502624	0.662285	0.499111	0.441304	0.431413	0.365511	0.414129	0.394415	0.984138	0.622008	0.981225	0.594281
CD4+ T Cell (Naive)	PD_1	-0.288984	0.194542	0.780889	-0.288984	1.59161	0.653735	2.50524	0.531112	1.8663	0.552583	0.964036	1.12712	0.51589	0.805964	0.999536	0.489348	0.774927	1.26741	0.819935	0.681019	0.589561	0.865067	1.30735	0.524858	0.802616
CD4+ CD8+ T Cell	PD_1	-0.276	0.196073	0.780889	-0.276	2.75915	2.38949	2.16464	2.52949	2.81225	2.38953	2.05132	2.53594	2.21329	3.14775	2.48961	1.70838	2.48096	2.65058	2.39672	2.63984	2.15051	1.61514	2.82526	0.965191	2.79148
CD4+ T Cell (Naive)	CD161	-0.419005	0.198248	0.780889	-0.419005	2.82242	1.25501	3.75101	1.35651	2.20062	1.09417	2.07804	2.69052	1.07172	1.3015	2.14229	0.821814	2.49429	2.12112	2.28553	1.7328	0.822998	1.23971	1.5924	0.929417	1.55515
CD4+ CD8+ T Cell	CD45RA	-0.231613	0.205521	0.790534	-0.231613	5.40543	5.28553	4.8609	5.34269	5.42279	4.75686	4.75596	4.74005	5.56456	5.48623	5.91038	5.05119	4.91526	4.85894	4.81831	4.97019	5.099	5.02699	5.65346	4.10198	5.48981
CD4+ T Cell (Treg)	CD57	-0.79819	0.211935	0.790534	-0.79819	2.49606	1.04868	2.21947	2.33888	6.01662	1.64445	1.48817	1.81081	1.52928	1.2798	7.12882	1.68243	1.24705	1.11801	1.99741	1.7418	1.48091	2.59039	2.48293	1.66863	2.37312
CD8+ T Cell (Central Memory)	PD_1	-0.326622	0.211987	0.790534	-0.326622	2.12752	2.18076	2.48288	1.68981	2.70665	2.38232	1.66781	2.13414	1.66555	3.04579	0.78019	1.74064	2.2116	1.55053	2.29072	1.63819	1.61212	0.985395	2.33529	0.722059	2.43216
CD4- CD8- T Cell	CD25	0.149448	0.212039	0.790534	0.149448	0.876596	0.904398	1.3012	0.414305	0.581969	0.823991	0.756714	0.959194	0.752193	1.18151	0.558607	0.682663	1.16097	1.33667	1.05987	0.79393	0.842276	1.00841	1.18628	0.811696	0.894155
CD4+ T Cell (Effector Memory)	IgD	0.106783	0.213335	0.790534	0.106783	0.588459	0.753993	0.564829	0.860266	0.473429	0.625516	0.663804	0.686779	0.631274	0.753172	0.655327	0.716742	0.823074	0.827133	0.609636	0.609767	0.625974	1.11633	0.737122	0.686221	0.912971
CD8+ T Cell (EMRA)	CD45RO	0.338016	0.215058	0.790534	0.338016	2.95007	1.61249	2.91371	1.07152	1.96368	2.66162	2.64683	2.26466	1.80222	2.45884	1.24592	3.19155	3.25724	2.27468	2.64651	2.26084	1.77956	2.03885	2.35255	1.72849	3.29676
CD4+ T Cell (Central Memory)	CD56_NCAM	0.126586	0.21846	0.795603	0.126586	0.631471	0.419667	0.438032	0.489025	0.444952	0.65754	0.396104	0.503572	0.574006	0.577802	1.03546	0.716669	0.682661	0.474999	0.611366	0.604594	0.467961	1.11639	0.53625	0.855432	0.806463
CD8+ T Cell (Effector Memory)	CD28	0.301767	0.2237	0.799319	0.301767	4.1701	4.42078	4.27536	3.12945	3.94652	4.33304	3.82869	4.15991	4.53198	5.23564	2.61844	4.19556	4.50095	4.95094	4.27413	4.2022	4.3446	4.71448	4.10176	3.6667	4.65717
CD4+ T Cell (Effector Memory)	CD123	0.137672	0.230105	0.799319	0.137672	0.605002	0.484164	0.478801	0.544677	0.472741	0.481123	0.449774	0.449171	0.753143	0.726499	0.88342	0.66993	0.527777	0.557224	0.46664	0.859031	0.566444	1.4522	0.566983	0.773693	0.689988
CD4+ CD8+ T Cell	CD161	-0.332215	0.233773	0.799319	-0.332215	3.02405	3.94983	3.07612	2.79785	2.93716	3.263	2.75761	3.38814	2.72786	3.62694	3.21067	2.46149	4.62191	2.5797	3.10437	3.3052	2.62275	1.86054	3.05257	1.58402	3.0846
CD8+ T Cell (EMRA)	CD123	0.108802	0.241079	0.801275	0.108802	1.10786	0.765396	0.897832	0.744883	0.833666	0.724922	0.7504	0.841025	1.06528	0.978918	1.14212	0.937423	0.897482	0.937007	0.827822	0.927042	0.970886	1.40001	0.972402	1.02947	1.14511
CD4+ T Cell (Naive)	TCRgd	0.124288	0.244849	0.801275	0.124288	0.586543	0.538898	0.739328	0.439392	0.545034	0.554836	0.446728	0.567941	0.594234	0.642067	1.04866	0.610986	0.627403	0.673682	0.474778	0.538105	0.50701	1.12668	1.0293	0.986307	0.762867
CD4+ T Cell (Central Memory)	IgD	0.105108	0.248887	0.801275	0.105108	0.542081	0.713024	0.545355	0.437103	0.492604	0.591118	0.479892	0.634576	0.573083	0.668596	0.73437	0.51278	0.588893	0.727979	0.571527	0.598494	0.448305	1.12952	0.716025	0.717784	0.868685
CD4+ T Cell (Effector Memory)	CD45RA	-0.224086	0.250667	0.801275	-0.224086	3.23024	1.34274	1.666	1.86157	1.6745	1.15394	1.9265	1.67598	1.81246	2.0224	2.3406	1.44131	1.66339	1.99844	1.60738	1.95218	1.0896	1.60164	1.74598	1.74872	1.735
CD8+ T Cell (Effector Memory)	CD127	0.278093	0.255686	0.801856	0.278093	3.85642	4.24189	4.52668	2.78448	3.82785	4.11815	3.67189	4.02491	4.36139	4.80643	2.82154	3.70782	4.88812	4.85661	3.81159	4.19266	3.98981	4.50116	3.54872	4.16152	4.25165
CD4+ T Cell (Naive)	CXCR5	-0.344027	0.256674	0.801856	-0.344027	2.44443	0.89729	3.22492	0.550238	0.853603	1.20145	0.754451	2.10303	0.778586	1.62059	1.74885	0.623671	0.929751	2.27275	1.32623	0.907477	0.639878	1.08165	0.737234	1.34587	1.40198
CD4+ T Cell (Treg)	TCRgd	0.174026	0.262765	0.804549	0.174026	0.735962	0.498433	0.616295	0.425561	0.469418	0.555114	0.404752	0.431325	0.605293	0.557356	1.31449	0.639051	0.607319	0.520175	0.404458	0.507377	0.450131	1.10276	1.67413	1.13509	0.712491
CD8+ T Cell (Central Memory)	CD161	-0.319751	0.26621	0.804549	-0.319751	1.80761	2.60766	2.3018	0.776467	1.27535	2.18399	1.29092	1.75424	0.723668	2.61781	1.39275	1.11174	2.49152	0.820019	1.05933	0.838755	1.86425	0.969807	2.49396	0.981462	1.20097
CD4+ T Cell (EMRA)	CD56_NCAM	0.307102	0.274433	0.804549	0.307102	0.925326	0.53488	0.691255	1.93908	1.26395	1.32736	1.07316	2.58871	0.715859	0.710661	1.42815	1.32373	3.00004	1.1471	0.929716	2.35689	0.755447	1.54213	1.3044	1.16747	1.54263
CD4+ T Cell (Effector Memory)	CXCR5	0.150181	0.277406	0.804549	0.150181	1.03836	0.845003	0.651637	0.537794	0.590434	1.1244	0.59317	1.12481	0.922657	1.33516	0.832453	0.748292	0.876915	1.15464	0.841619	0.86796	0.775884	1.11873	0.722481	1.58664	1.53217
CD4+ T Cell (EMRA)	CD66b	0.553125	0.278321	0.804549	0.553125	0.537723	1.27935	0.465418	1.41991	1.03742	0.378837	0.741801	0.752983	3.9125	0.807942	1.93052	1.84401	0.880096	0.732984	0.619788	1.35871	1.80878	3.32003	4.97399	0.922041	1.12937
CD8+ T Cell (Naive)	CD11c	0.573502	0.281055	0.804549	0.573502	3.97826	0.971124	2.26788	0.878303	2.98877	1.14935	1.02181	2.92011	2.95232	1.21318	4.46234	4.11291	1.62545	1.24579	0.900472	3.61444	3.36141	3.64478	3.84947	2.20961	3.71925
CD4- CD8- T Cell	CTLA_4	0.272393	0.282141	0.804549	0.272393	1.6177	1.42111	2.07713	1.14448	1.13633	1.94838	0.4794	2.15331	1.71325	1.73248	0.783503	2.28678	1.56607	2.28705	2.1044	1.29767	2.41981	1.19129	2.41361	0.735644	1.15529
CD8+ T Cell (Central Memory)	CD294	0.26063	0.283721	0.804549	0.26063	1.65322	1.59909	2.84326	3.15894	2.47978	2.84807	2.94202	2.84362	3.56197	2.80384	1.43569	3.14107	2.31444	2.44588	3.08823	3.02822	2.79522	2.80729	3.22382	3.0262	2.34458
CD8+ T Cell (Naive)	CD57	-0.888356	0.285193	0.804549	-0.888356	2.87702	1.67066	5.50425	5.61886	6.76115	1.92629	4.52023	7.00274	2.32261	2.98608	7.74254	4.24753	1.96689	1.78795	3.3713	2.95588	2.56245	3.47361	7.49619	2.9409	4.79777
CD8+ T Cell (EMRA)	CD28	0.425711	0.290539	0.804549	0.425711	4.38584	3.66364	3.84466	1.53057	3.44735	3.96263	2.92848	3.77749	3.111	5.01892	1.46931	3.44998	4.29255	4.88026	3.91137	4.00283	3.12455	4.27946	2.1689	3.7563	4.15444
CD4+ T Cell (Treg)	IgD	0.130391	0.290652	0.804549	0.130391	1.22771	0.796089	1.14074	0.515383	0.649621	0.657192	1.30426	0.980475	0.62069	0.688747	1.0492	0.852198	1.23644	0.809165	0.95542	0.753738	0.748166	1.19042	1.02172	1.38052	1.11077
CD4+ T Cell (Central Memory)	TCRgd	0.118599	0.291103	0.804549	0.118599	0.521163	0.457959	0.418656	0.43181	0.377739	0.441557	0.359254	0.391088	0.540265	0.548137	1.04202	0.529387	0.501891	0.490246	0.39647	0.457225	0.39119	1.04115	0.670332	1.06458	0.670482
CD4+ T Cell (EMRA)	CD294	0.267672	0.291257	0.804549	0.267672	2.69394	2.31378	0.845134	0.763047	1.01685	1.25817	1.00016	1.58726	1.46595	1.66012	1.22655	1.90102	1.43022	2.14129	0.951072	1.49321	1.33257	1.69669	2.94271	1.31356	1.86617
CD8+ T Cell (EMRA)	CD27	0.36644	0.295548	0.804549	0.36644	4.47113	3.75091	4.36446	2.64165	3.4374	3.8897	3.60987	4.11764	3.69206	5.00374	1.31951	3.99472	4.35494	4.68037	4.12874	4.02012	3.19584	4.25915	2.92215	4.10709	4.63591
CD4- CD8- T Cell	CD45RA	-0.204272	0.297188	0.805185	-0.204272	5.10277	4.98796	5.5471	4.58675	5.01618	4.7141	4.99108	4.76411	5.17561	5.07891	5.04556	5.30406	5.17667	5.43371	4.98962	4.8541	4.86449	4.04211	4.99543	3.55319	4.7531
CD8+ T Cell (Central Memory)	TCRgd	0.144435	0.300429	0.806958	0.144435	0.613019	0.570756	0.550653	0.662951	0.498034	0.583835	0.381086	0.507758	0.584142	0.659477	1.30766	0.626768	0.62096	0.605186	0.534956	0.501966	0.525689	0.736869	1.57588	1.17081	0.835596
CD4+ T Cell (Effector Memory)	CD57	-0.990863	0.30522	0.806958	-0.990863	5.57842	1.71612	7.52647	6.89334	6.97691	2.20157	6.77827	2.23799	1.47004	3.25367	8.22651	5.48767	2.63001	1.83463	4.80651	2.59684	5.68767	2.50748	7.08671	1.83779	3.66998
CD4+ CD8+ T Cell	CCR4	0.246261	0.305694	0.806958	0.246261	3.0679	3.16403	3.42332	3.35559	3.41918	4.20744	3.30561	4.46478	3.73355	4.91307	3.46649	3.60272	3.7528	5.06359	4.01899	3.69516	3.68465	4.04861	3.36831	3.60315	4.46189
CD8+ T Cell (Effector Memory)	CCR7	0.188369	0.307203	0.806958	0.188369	1.10763	1.04464	0.665442	0.878234	1.19213	0.889711	1.03081	1.39683	2.32007	1.14727	1.10583	1.35201	1.67869	1.6502	0.959304	1.06292	0.902997	1.79244	1.00978	1.96278	1.12946
CD4- CD8- T Cell	CXCR3	0.275703	0.312965	0.806958	0.275703	2.3556	2.61575	3.11875	1.58692	1.72158	2.94945	2.6956	2.83685	2.5106	3.73492	2.9326	2.44831	3.07478	3.96341	2.59221	2.01157	2.31134	2.74687	2.68056	3.6586	3.6863
CD4+ T Cell (Naive)	CD294	0.141164	0.314925	0.806958	0.141164	1.61563	1.46346	1.39061	1.16895	1.45444	1.35126	1.29134	1.35265	1.69079	1.88547	1.73076	1.4338	1.43347	1.9531	1.42134	1.44837	1.33617	1.73312	2.53925	1.49094	1.52697
CD8+ T Cell (Effector Memory)	TCRgd	0.0793065	0.321516	0.811567	0.0793065	0.575548	0.586405	0.558694	0.666422	0.489786	0.60717	0.390837	0.480218	0.605988	0.714275	0.827012	0.631486	0.679784	0.628328	0.583829	0.529412	0.57925	0.695042	0.795004	0.893213	0.68895
CD4- CD8- T Cell	IgD	0.0912599	0.331373	0.811567	0.0912599	0.752497	0.754472	0.615243	0.632358	0.549368	0.718764	0.533536	0.958104	0.696919	0.62234	0.662071	0.689877	0.562808	0.984048	0.674246	0.549006	0.601928	0.895577	1.12907	0.682815	0.957469
CD8+ T Cell (Effector Memory)	CD11c	0.316992	0.336003	0.811567	0.316992	2.74448	0.885006	0.892743	0.728834	0.989195	1.04185	0.777452	0.97077	2.1859	1.02816	2.36965	2.00237	1.24284	1.08397	0.824438	1.32947	1.57364	3.35219	2.43022	0.680018	1.93624
gd T Cell	CD66b	0.536309	0.33893	0.811567	0.536309	0.568579	1.02241	0.503538	1.26576	1.05918	0.455271	0.68908	0.623125	4.05542	1.01017	1.75096	1.23213	0.601199	0.876285	0.620226	1.15492	1.61461	4.33525	4.99993	0.831845	0.918054
CD8+ T Cell (Effector Memory)	IgD	0.0759822	0.3504	0.819604	0.0759822	0.78156	0.787742	0.589482	0.895692	0.489499	0.819579	0.685097	0.691283	0.66852	0.749236	0.608077	0.725808	0.683665	0.795943	0.879643	0.598435	0.881662	0.97747	0.772316	0.629399	0.875268
CD4+ T Cell (Effector Memory)	CD25	0.172039	0.350661	0.819604	0.172039	1.70859	2.35613	1.09491	0.928264	1.30471	1.99481	1.20979	1.73242	1.4135	2.22601	0.968181	1.83193	1.72585	1.8158	1.88835	1.79855	2.00999	1.77734	1.45514	1.00963	1.80538
CD8+ T Cell (Naive)	IgD	0.112206	0.354548	0.823771	0.112206	0.604922	0.758071	0.575545	0.505637	0.61963	0.607189	0.586401	0.775304	0.58624	0.68252	1.15064	0.655759	0.522282	0.727546	0.555299	0.59544	0.502481	1.07646	1.4416	0.797595	1.02223
gd T Cell	PD_1	0.293841	0.35915	0.826452	0.293841	1.82484	0.974791	1.51986	1.76035	2.48962	1.92889	1.50474	1.50171	2.60425	2.19429	0.804261	1.56712	1.69974	2.37671	1.32216	1.56201	1.94718	2.48579	3.8756	0.62436	2.8483
CD4+ T Cell (Central Memory)	CD294	0.0998026	0.364923	0.826452	0.0998026	1.17692	1.02051	1.05565	0.848865	1.26555	1.05663	0.926727	0.946596	1.10465	1.37145	1.20323	1.19157	1.05603	1.09445	1.04218	0.948663	1.00882	1.45333	1.82624	1.16641	1.09832
CD4+ T Cell (Effector Memory)	CD161	-0.152096	0.366177	0.826452	-0.152096	3.14953	3.41434	3.00145	3.22148	3.14926	3.32094	3.11521	3.21664	3.4367	3.68889	3.60548	3.1764	3.86805	2.74163	3.6103	3.12862	3.00826	3.03189	3.23728	2.12922	3.5655
CD8+ T Cell (Naive)	CD161	-0.252504	0.369784	0.826452	-0.252504	0.678793	0.808322	2.95018	0.741106	1.52441	0.767167	1.00039	1.98934	0.719181	1.55478	1.91722	0.869806	0.84522	0.895679	0.826608	0.806983	0.784762	1.02581	2.62814	1.09254	1.0184
CD8+ T Cell (Naive)	TCRgd	0.16644	0.371855	0.826452	0.16644	0.609321	0.581834	0.675605	0.585622	0.619585	0.613102	0.597615	0.658697	0.626439	0.71104	1.54125	0.727189	0.624198	0.674182	0.577176	0.614276	0.561089	0.709267	2.31156	1.11258	0.862076
CD8+ T Cell (EMRA)	CD127	0.284834	0.372512	0.826452	0.284834	4.14584	3.72958	4.07369	3.11178	3.28711	3.63988	2.85932	3.35119	2.24622	4.61757	2.43311	2.534	4.67786	4.81644	3.19797	3.97215	2.83843	3.76729	3.29082	4.33034	3.50966
gd T Cell	CD56_NCAM	-0.28143	0.376812	0.826452	-0.28143	1.66194	1.14669	2.93619	2.72329	1.94923	3.12154	1.61979	2.77026	1.99417	3.76558	2.12025	2.68492	3.5093	1.68314	1.3883	2.66754	1.28069	2.17354	1.9795	1.60044	1.68099
CD4+ T Cell (EMRA)	CCR6	0.210647	0.386326	0.838179	0.210647	2.91202	2.70514	3.11447	2.59565	2.61466	2.34007	2.73092	3.21397	1.20743	1.9093	3.42932	2.6014	2.84618	3.63173	2.99754	2.1722	2.44459	2.74483	3.23529	2.28432	3.30564
CD4+ T Cell (Treg)	CTLA_4	0.214718	0.389663	0.838179	0.214718	3.90398	2.8105	3.16812	2.57778	2.66114	2.41997	3.21013	2.97622	3.66417	2.89155	3.94749	3.56447	3.36575	3.01083	2.98512	3.10721	2.92549	2.18195	4.17808	4.25308	3.69434
CD8+ T Cell (Central Memory)	HLA_DR	-0.229143	0.390146	0.838179	-0.229143	3.32935	2.6476	1.91929	3.82773	2.03468	2.66281	2.84566	2.3064	1.94238	2.63043	3.31175	3.43274	2.83544	1.71365	1.99243	1.9432	2.49195	2.44453	2.81013	1.66232	3.16226
CD4+ T Cell (Effector Memory)	CD56_NCAM	0.17033	0.40125	0.838179	0.17033	0.619855	0.433961	0.51641	1.55891	0.597726	0.638604	0.481121	0.526809	0.620976	0.560287	0.947371	0.701691	2.41713	0.541504	0.671833	0.64451	0.432062	1.08133	0.571587	0.718651	0.743032
CD4+ CD8+ T Cell	CD66b	0.418257	0.404808	0.838179	0.418257	0.693762	1.34302	0.56421	1.65578	1.24385	0.540699	0.545791	0.745058	3.82306	1.13088	1.96715	1.4169	0.782406	0.706158	0.727127	1.37953	1.54098	3.44986	4.96234	1.01188	1.1629
gd T Cell	TCRgd	-0.161681	0.408608	0.840314	-0.161681	5.1262	4.65533	4.74482	5.24029	5.12824	5.41979	4.98257	4.40865	5.21925	5.25738	5.36439	5.32049	4.29313	4.94078	4.65953	4.81025	4.78613	5.35623	5.43616	3.7966	5.48107
CD4+ T Cell (Effector Memory)	CD27	0.214598	0.408888	0.840314	0.214598	4.33208	4.28307	3.684	3.1775	3.64354	4.56124	3.85628	4.75775	4.73678	5.28585	3.27234	4.32489	4.48795	4.48981	4.3999	4.6517	4.17201	4.91622	3.16829	4.02456	4.9565
CD8+ T Cell (Central Memory)	CD57	-0.546343	0.416524	0.844675	-0.546343	5.67709	1.7789	2.97181	4.8291	3.62931	1.8977	3.30952	2.46802	1.30299	3.83862	6.31961	3.03329	3.49987	1.03464	2.25115	1.896	1.63188	2.51465	5.98172	2.12546	5.13398
CD4+ T Cell (EMRA)	CD127	0.153096	0.419322	0.844675	0.153096	4.55313	4.65016	4.68151	4.11438	3.64058	4.32167	3.68058	4.4507	4.01208	4.81763	4.19303	4.06539	5.09896	5.11568	3.90132	4.7787	3.86149	4.62518	4.27353	4.23099	4.41193
CD4- CD8- T Cell	CD294	0.205598	0.419765	0.844675	0.205598	1.27914	1.20232	2.54348	0.883226	1.10412	1.35434	2.28114	1.6481	1.99475	1.9152	1.65118	1.40123	1.14103	2.80511	2.32104	1.3236	1.92136	1.50176	2.99482	1.49425	1.38541
CD4+ T Cell (Effector Memory)	CD38	0.250403	0.42311	0.844675	0.250403	3.27045	1.84306	2.56275	4.36548	2.79592	2.90411	1.83676	2.24758	3.16476	2.40002	3.20856	4.45087	2.73352	2.90281	2.1803	2.62337	3.30403	3.25028	3.7815	1.99186	3.10317
CD4+ T Cell (Central Memory)	CD66b	0.378757	0.423265	0.844675	0.378757	0.399932	0.774003	0.384472	0.929532	0.72596	0.327614	0.497799	0.431704	3.6985	0.791972	1.5652	1.12382	0.51984	0.528747	0.508546	0.981344	1.17879	2.8658	4.30352	0.731046	0.615837
CD8+ T Cell (Effector Memory)	CD66b	0.340804	0.431146	0.851989	0.340804	0.57554	0.839803	0.435128	1.1316	0.670791	0.484043	0.598401	0.495325	3.24695	0.799299	1.47186	1.10345	0.590532	0.588275	0.654859	0.844641	1.17199	2.56926	4.31745	0.65521	0.683957
CD4+ T Cell (Central Memory)	CD57	-0.204	0.434293	0.851989	-0.204	2.53545	1.04151	1.97491	2.10166	2.21611	1.53843	1.74033	1.78067	1.28209	1.52351	3.70158	1.74892	1.2306	1.09156	1.93318	1.68279	1.41248	2.504	1.94499	1.6459	2.25309
gd T Cell	CD11c	0.364015	0.435096	0.851989	0.364015	3.82947	1.54623	3.5105	2.10921	2.75835	3.59476	2.27383	2.7268	4.01964	2.06764	4.0722	3.32471	1.9194	5.87098	0.967523	3.61335	3.2264	3.92496	3.60881	2.80332	3.934
CD4+ T Cell (Naive)	IgD	0.0802522	0.43936	0.851989	0.0802522	0.634452	0.727802	0.87957	0.359899	0.577472	0.596885	0.669954	0.775053	0.553208	0.644564	0.817194	0.527945	0.575594	0.779428	0.546772	0.625509	0.487505	1.22509	0.826182	0.74478	1.04194
CD4+ T Cell (Effector Memory)	CD66b	0.349095	0.442008	0.851989	0.349095	0.422277	0.826824	0.445453	1.03199	0.706325	0.335092	0.616036	0.43327	3.62172	0.809238	1.45336	1.13075	0.61088	0.551532	0.555575	0.941713	1.20457	2.75361	4.19269	0.635611	0.642741
CD4+ T Cell (Central Memory)	CD25	0.0952811	0.443954	0.851989	0.0952811	1.48208	1.82042	1.78518	1.4524	1.49246	1.81127	1.27146	1.66445	1.27148	1.9376	1.3498	1.7871	1.9417	1.7697	1.7945	1.69506	1.72949	1.70575	1.7351	0.930154	1.62661
gd T Cell	CCR4	0.315395	0.444458	0.851989	0.315395	1.7931	1.26544	2.08596	1.50049	2.21231	1.90466	2.75884	3.59031	2.24402	4.32805	2.54893	1.00948	1.36568	4.61994	1.8562	3.03494	3.02545	3.27841	2.72185	3.06785	3.02155
CD8+ T Cell (Naive)	CD45RO	0.158783	0.454381	0.856148	0.158783	1.40801	1.1423	2.82465	0.983354	2.34722	1.64893	1.83589	2.34188	1.87961	1.62915	2.04628	2.37416	1.41724	2.02408	1.89932	2.11534	1.59984	1.97723	2.68426	1.51032	2.24719
CD4+ T Cell (Central Memory)	PD_1	-0.176521	0.455956	0.856148	-0.176521	2.27896	1.76518	2.54195	1.79161	2.50072	1.76241	1.53751	1.96439	2.11535	2.47262	2.36652	1.65983	1.79009	2.79779	2.69285	1.5203	2.04603	1.23175	2.43649	0.605164	2.45197
CD4- CD8- T Cell	CCR7	0.207185	0.463107	0.858358	0.207185	2.99558	3.91983	2.93579	2.26	2.56481	3.79257	2.88385	2.98887	4.43663	4.72783	3.05659	3.38944	3.91778	4.43235	3.36757	2.69978	3.71169	3.85937	3.07115	3.39361	3.4676
CD4+ T Cell (Central Memory)	CXCR5	-0.277117	0.463207	0.858358	-0.277117	2.44614	1.25094	3.13646	0.799786	0.898326	2.17406	1.21436	2.36038	1.18377	3.14206	2.81146	0.770098	1.08157	3.0289	2.12332	1.2794	0.793547	1.59956	0.819839	2.18071	3.02257
CD4+ T Cell (Treg)	CD66b	0.372361	0.463922	0.858358	0.372361	0.737616	0.935858	0.621683	1.15131	0.852599	0.370255	0.942029	0.610995	3.96014	0.850612	1.92326	1.24283	0.793048	0.527724	0.665356	1.04432	1.33795	3.06757	4.95263	1.08699	0.78371
CD8+ T Cell (Naive)	CD123	0.12753	0.464477	0.858358	0.12753	1.02077	0.799047	0.970171	0.734212	0.853873	0.727928	0.827732	0.881946	1.04188	1.03129	2.32175	1.22093	0.876976	0.958651	0.769155	1.07825	1.03977	1.58166	1.76551	1.03156	1.1443
CD8+ T Cell (Central Memory)	CD11c	0.293503	0.465085	0.858358	0.293503	2.40707	0.915111	0.816407	0.804839	1.01358	0.893816	0.827924	0.943858	2.4325	1.02467	3.76774	1.85492	1.33453	0.985753	0.75714	1.33753	1.58726	3.47195	2.99348	0.874899	2.1444
CD8+ T Cell (Central Memory)	CD56_NCAM	0.0941405	0.475712	0.858358	0.0941405	0.801445	0.52557	0.452479	0.938201	0.496198	0.711318	0.378232	0.549399	0.554121	0.643623	1.48635	0.681901	0.912284	0.494224	0.609157	0.605479	0.516883	1.05806	1.16331	0.841854	0.910005
CD4- CD8- T Cell	CD11c	0.279461	0.47575	0.858358	0.279461	3.49309	1.76781	1.42747	1.81334	2.9843	1.65414	0.634292	2.87799	3.15682	1.36131	3.38206	3.22631	2.09601	2.34567	1.08413	2.72925	3.19769	2.98632	3.16323	1.00434	3.28222
CD8+ T Cell (Effector Memory)	CD57	-0.389072	0.476808	0.858358	-0.389072	6.95252	6.55028	6.90835	5.80742	6.09071	6.88382	6.91387	6.54841	5.70629	6.3946	7.19983	7.40207	7.07156	1.9903	7.06738	5.91045	6.50755	4.75039	7.54635	5.15311	8.12473
gd T Cell	CD161	-0.171422	0.486002	0.860541	-0.171422	3.9686	3.72964	4.11731	2.55109	2.99243	3.44532	2.71354	3.55288	3.43682	4.40114	3.15014	2.69325	4.20112	3.96661	3.33171	3.03453	3.26107	2.76485	2.93633	2.77549	3.91983
CD8+ T Cell (Central Memory)	CCR4	0.156977	0.486497	0.860541	0.156977	2.6065	3.32348	3.94178	3.43235	3.29608	4.09787	3.56641	4.02539	3.68924	4.7662	3.18807	3.56695	3.86755	4.62958	4.08569	3.49988	3.63923	4.1173	3.38959	3.05097	4.0261
CD8+ T Cell (Naive)	CD38	0.182804	0.488486	0.860541	0.182804	3.57726	2.41951	3.8913	4.37438	2.98357	3.00594	2.40175	3.05151	3.0961	2.88463	4.06582	4.32486	3.11992	3.4873	2.55316	3.31902	3.1046	3.29004	4.06626	2.9398	4.1247
CD4+ T Cell (Effector Memory)	CD28	0.108645	0.489244	0.860541	0.108645	4.80276	4.79851	4.34504	4.54165	4.33284	4.75382	4.23709	4.58069	4.85869	5.51555	4.60273	4.72142	4.8792	5.17107	4.61424	4.72431	4.71862	5.05802	4.82113	3.98389	5.09398
CD8+ T Cell (Naive)	CCR4	0.246238	0.49564	0.865156	0.246238	1.52878	1.14032	3.53691	2.1815	2.66806	2.55265	3.18294	3.77487	3.00668	4.00158	3.40546	2.74054	1.25691	4.18819	3.78661	3.20505	2.99331	3.5107	2.90217	3.0888	2.9535
CD4+ T Cell (Naive)	CD66b	0.338345	0.500451	0.865156	0.338345	0.470264	0.926308	0.608698	1.17307	1.13478	0.37037	0.722191	0.540384	3.93718	0.823785	1.8255	1.30027	0.573876	0.545465	0.588785	1.13909	1.31931	3.10586	4.68923	0.772308	0.742469
CD8+ T Cell (Naive)	CD66b	0.367567	0.502741	0.865156	0.367567	0.389531	0.885365	0.557437	1.14882	1.10066	0.368415	0.636449	0.55368	3.99131	0.87748	2.15224	1.33368	0.516497	0.587257	0.602419	1.05919	1.29162	2.94658	5.34365	0.752057	0.753089
CD8+ T Cell (Central Memory)	CD66b	0.323569	0.505446	0.867903	0.323569	0.568535	0.958518	0.41129	1.25782	0.682865	0.403059	0.524331	0.437199	3.50825	0.821087	1.78062	1.00599	0.551075	0.514678	0.509588	0.803767	1.21303	2.7427	4.7434	0.723404	0.749499
CD4+ T Cell (Treg)	CD38	0.131325	0.508718	0.871611	0.131325	5.27305	3.79547	4.83186	3.89229	4.12827	4.41005	4.07477	3.64882	4.46343	4.17394	4.59808	4.85436	5.01555	4.21143	4.10599	3.95558	4.17539	3.8915	4.8695	4.74893	4.47595
CD4+ T Cell (Naive)	CD11c	0.366132	0.510573	0.871716	0.366132	4.13096	0.918291	4.11369	0.666491	3.6091	1.08514	4.0539	3.13308	2.85745	1.05273	4.08564	3.88499	3.0952	1.33125	0.735506	3.83738	3.43632	3.8725	3.31743	3.00423	4.15239
CD8+ T Cell (EMRA)	TCRgd	0.0519344	0.514433	0.872988	0.0519344	0.640407	0.56511	0.63592	0.689721	0.52454	0.710502	0.470461	0.592477	0.605946	0.714821	0.843193	0.630512	0.748166	0.651189	0.54108	0.581564	0.520355	0.680906	0.834026	0.892366	0.796544
gd T Cell	CD45RA	-0.180675	0.515624	0.872988	-0.180675	5.2721	4.5999	5.52841	5.40469	4.87015	5.03946	5.82246	4.3026	5.64811	5.0135	5.96726	5.27859	4.27326	5.75782	4.59596	5.15252	4.90669	5.23436	5.91085	3.47456	5.85284
CD8+ T Cell (EMRA)	CXCR5	0.0662108	0.518021	0.872988	0.0662108	0.826225	0.53675	0.667652	0.382641	0.51882	0.549323	0.43996	0.673673	0.506323	0.964944	0.688192	0.485393	0.619117	0.985819	0.574442	0.609131	0.499424	0.63502	0.458141	1.01543	0.920646
CD4+ T Cell (EMRA)	CXCR3	0.222172	0.518445	0.872988	0.222172	2.58658	1.4708	2.80542	1.23798	1.34759	1.96013	1.70973	3.15699	1.18697	3.48357	3.18534	1.55112	2.47712	2.92786	1.98404	2.29437	1.45456	2.54168	1.89279	3.43516	3.6004
gd T Cell	CD57	-0.479656	0.537892	0.885047	-0.479656	6.84867	2.20986	7.28062	7.48938	7.09844	7.51799	7.22432	6.1415	7.38208	6.33951	7.56901	7.88752	7.0607	2.0325	7.74425	6.73722	6.99347	6.15267	7.21057	2.36016	7.48017
CD8+ T Cell (Naive)	CD28	0.101795	0.539343	0.885047	0.101795	4.20329	4.30258	4.48067	4.22531	4.27866	4.18233	3.91978	4.44061	4.52474	5.20554	3.73803	4.28487	4.14484	5.07599	4.52532	4.37203	4.29199	4.65219	4.5378	3.71954	4.59659
CD8+ T Cell (Effector Memory)	CD45RO	0.079094	0.539639	0.885047	0.079094	2.91455	2.79138	3.11291	2.3309	2.59475	2.99548	2.68639	2.81737	2.67805	2.95268	2.51928	3.06826	3.11587	3.05043	3.04658	2.70983	2.55486	2.5238	2.7336	2.35313	3.26524
CD8+ T Cell (EMRA)	CD66b	0.28573	0.539795	0.885047	0.28573	0.565637	0.916285	0.43139	1.25101	0.870063	0.490636	0.586129	0.511133	3.7562	0.913861	1.62927	1.24036	0.580199	0.563218	0.596615	0.982842	1.23068	2.53338	4.49766	0.726667	0.743499
CD8+ T Cell (EMRA)	IgD	0.0531238	0.539876	0.885047	0.0531238	0.714419	0.787202	0.450937	0.747025	0.470277	0.709331	0.448106	0.605306	0.526752	0.713503	0.637196	0.532001	0.592768	0.77837	0.487948	0.565863	0.531447	0.821044	0.712993	0.731006	0.968753
CD4+ T Cell (Naive)	CD56_NCAM	0.0790791	0.541427	0.885047	0.0790791	0.811453	0.524919	1.45589	0.473231	0.75856	0.849186	0.517069	0.909095	0.653848	0.693848	1.34383	0.822737	0.951564	0.751588	0.704637	0.826179	0.61497	1.29488	0.955177	0.962099	1.08053
gd T Cell	CXCR3	0.201039	0.542735	0.885337	0.201039	2.31877	2.27953	3.27882	1.56781	1.50469	2.59634	1.47172	3.53731	2.02915	3.88677	2.9188	1.83561	2.23404	3.69405	2.36518	2.05448	1.87607	2.92126	3.08004	3.52364	3.32575
CD8+ T Cell (EMRA)	CXCR3	0.175259	0.547768	0.88821	0.175259	2.71563	1.48054	2.88603	1.43162	1.72697	2.20357	1.64419	2.51755	1.53796	3.55508	2.44622	2.20412	2.2969	3.30395	1.92644	1.79431	1.63736	2.13111	1.84346	3.16011	3.40517
CD4+ T Cell (EMRA)	PD_1	0.2101	0.547899	0.88821	0.2101	2.8099	2.85559	1.43568	2.70909	2.61533	2.00915	2.11926	2.33703	0.63872	1.19412	2.80937	2.20614	2.32532	3.20132	2.11986	2.22919	3.22745	1.28935	3.4842	0.614518	2.79749
CD4+ T Cell (Treg)	CXCR5	-0.153744	0.55274	0.891825	-0.153744	1.66498	0.981041	1.93167	0.67741	0.779487	1.58199	0.825544	1.3008	0.850797	2.43489	2.38106	0.788059	1.04022	2.48965	0.942412	0.821607	0.771078	1.40244	0.95137	1.55413	1.71038
gd T Cell	CD27	0.173486	0.558198	0.891825	0.173486	4.3228	4.85195	4.22917	3.64746	4.29129	4.63816	3.76184	5.03222	4.44838	5.68096	2.63144	4.0365	4.69811	5.02316	4.60129	4.71376	4.6381	4.94618	4.04962	3.27131	4.97107
CD4- CD8- T Cell	CD38	-0.230532	0.559407	0.891825	-0.230532	5.15261	5.02842	5.61511	4.56528	4.58804	5.20162	3.64243	4.96072	4.9721	5.66324	3.27695	5.62669	5.44032	5.78494	5.13794	4.8061	5.07989	3.22184	4.01611	2.42915	4.03034
gd T Cell	CCR7	0.23417	0.560381	0.891825	0.23417	2.43613	4.19975	2.10126	2.43634	3.17262	3.98794	2.25379	3.74188	4.41307	4.84836	2.76105	1.14017	3.11337	4.22395	3.53928	3.51153	4.22279	4.27186	4.07274	3.5696	3.72387
CD8+ T Cell (Effector Memory)	CD45RA	-0.204976	0.564015	0.893476	-0.204976	3.79641	2.69547	1.84401	3.12546	1.20943	1.24188	1.2459	2.06714	1.70692	2.1235	4.07477	1.25393	2.08502	2.62822	1.8837	1.16717	1.99926	2.16025	3.10994	2.12606	2.38293
CD8+ T Cell (Naive)	PD_1	-0.155824	0.564841	0.893476	-0.155824	0.696834	0.730598	2.24043	0.947077	2.17652	0.702596	1.31328	1.7679	1.10586	2.18651	0.687337	0.999178	0.782949	1.55171	0.744297	1.23413	0.830407	0.957846	2.67561	0.58001	1.31738
CD4+ T Cell (Central Memory)	CD161	-0.0836611	0.574759	0.900073	-0.0836611	2.92986	2.95827	3.71939	2.92456	2.90257	2.90776	2.75087	3.16606	3.22708	3.23968	3.18525	3.07316	3.58187	3.01838	3.31866	2.98167	2.75049	2.63973	2.88099	2.32891	3.41803
CD4+ T Cell (Treg)	PD_1	-0.108212	0.578604	0.900354	-0.108212	2.57482	1.64983	2.40257	1.9549	1.9718	2.00855	1.51789	2.01039	1.67037	1.9728	2.29779	1.31157	2.35486	2.07893	2.04171	1.9514	1.69339	1.28196	2.80606	1.11112	2.31568
CD4+ T Cell (EMRA)	CD161	0.126135	0.586112	0.906969	0.126135	3.22787	2.78872	2.37697	2.49202	2.30918	2.78228	1.99455	3.15943	1.93879	2.15572	3.32497	2.73032	3.7161	2.51442	2.53519	3.02996	2.54704	2.11751	3.07614	1.7141	3.23556
CD8+ T Cell (Central Memory)	CD45RA	-0.191586	0.588497	0.907717	-0.191586	3.79737	2.66585	1.73278	3.07486	1.20435	1.22179	1.17391	2.0423	1.70161	2.14062	4.02792	1.22914	2.11879	2.6153	1.88903	1.15101	1.94009	2.16789	3.02949	2.1811	2.29263
CD4- CD8- T Cell	CD66b	0.274722	0.592751	0.907717	0.274722	0.676071	1.59948	0.418737	2.16409	1.34162	0.464252	0.663058	0.820447	4.19028	0.882884	1.64692	1.16871	0.729773	0.919393	0.738358	1.21842	2.5614	2.5719	4.87565	0.679943	0.799894
CD8+ T Cell (Effector Memory)	CD27	0.171375	0.593145	0.907717	0.171375	4.2511	4.32559	4.65968	3.33922	3.93096	4.51878	3.89659	4.49318	4.12999	5.09967	1.9964	4.31472	4.52851	4.66769	4.64761	4.28058	4.2295	4.61067	2.58005	3.63761	4.79969
CD4- CD8- T Cell	TCRgd	-0.0978366	0.59428	0.907717	-0.0978366	0.930675	1.17571	1.04783	0.979631	2.3192	1.15284	1.85219	0.844628	0.875698	0.98069	1.40581	1.04702	0.790175	0.997999	1.6142	0.743822	0.893796	0.807126	1.64259	1.36618	1.45044
CD4+ T Cell (Central Memory)	CD45RO	0.057302	0.595879	0.907717	0.057302	2.73286	2.81928	2.95964	2.54931	2.61692	2.81368	2.42803	2.83692	2.84123	2.9692	3.10666	2.78681	3.00757	3.25522	2.88128	2.80835	2.5994	2.77991	2.68322	2.5531	3.10337
CD4+ T Cell (Effector Memory)	CCR4	0.146591	0.602711	0.907717	0.146591	3.7858	3.50708	3.67762	3.04097	2.78845	4.37774	3.30785	4.47522	3.86117	5.18792	3.17627	3.61165	3.31735	4.96999	3.87732	3.79168	4.14869	4.03484	3.18893	3.2707	4.69664
CD4+ CD8+ T Cell	CD28	0.0945111	0.602826	0.907717	0.0945111	4.9294	5.0803	4.44757	4.58594	4.71315	4.90729	4.26184	4.98715	4.92566	5.83896	4.70299	4.65067	5.2258	5.60104	4.83839	4.98523	4.7691	5.22147	4.88903	4.10862	5.18326
gd T Cell	CD28	0.139817	0.605677	0.910259	0.139817	4.51645	4.77948	4.18071	3.50507	4.18623	4.18728	3.64299	4.78333	3.95988	5.4416	3.07006	3.05763	4.64486	5.2423	4.1929	4.56342	4.41829	4.72899	4.36184	3.77388	4.46233
CD4- CD8- T Cell	CD123	0.0540075	0.615198	0.916174	0.0540075	0.908961	0.470915	0.722074	0.62402	0.728347	0.420788	0.447294	0.629053	0.997108	0.721224	0.808693	0.663923	0.469243	0.761066	0.494846	0.804479	0.904562	1.03652	1.07751	0.424264	0.702275
CD4+ T Cell (Treg)	CCR4	-0.105039	0.615463	0.916174	-0.105039	4.50063	4.0491	5.06487	4.41282	4.06946	4.69822	4.17482	4.83676	4.0269	5.28482	4.67101	3.77629	4.82005	5.40576	4.60936	4.21015	4.23568	3.99718	3.92807	4.20253	5.02765
CD8+ T Cell (Central Memory)	CCR7	0.0615265	0.62033	0.919305	0.0615265	3.46159	3.58395	3.19469	3.27605	3.24734	3.50925	3.10383	3.33656	4.16779	3.76159	3.59847	3.50556	3.82052	3.77605	3.63626	3.1363	3.48536	3.43729	3.54625	3.56156	3.47474
CD8+ T Cell (Effector Memory)	CD161	-0.260039	0.621931	0.919305	-0.260039	2.67883	4.52542	3.55668	0.821377	2.16738	4.57043	1.90075	3.08971	2.56052	4.20146	1.29895	3.50956	4.89326	2.46894	2.41929	2.95139	3.81698	1.19698	1.77136	0.85215	2.03926
CD8+ T Cell (Central Memory)	CD127	0.0760417	0.627472	0.919305	0.0760417	4.16685	4.48492	4.7137	4.47846	4.09	4.30673	3.87762	4.41332	4.72908	5.04728	3.94208	4.35465	4.79595	5.03887	4.14887	4.23283	3.9908	4.6593	4.61924	4.2191	4.56447
CD4+ T Cell (Treg)	CCR6	0.155412	0.631047	0.920131	0.155412	2.37673	2.18195	3.20422	1.55411	1.54909	2.20499	1.9726	2.96974	1.44359	2.97127	2.86321	1.15332	2.71718	3.48295	2.54187	1.55549	1.39956	2.50387	3.6477	2.22711	3.31733
CD8+ T Cell (Central Memory)	IgD	0.0416146	0.638759	0.921914	0.0416146	0.704584	0.750899	0.521623	0.773576	0.504009	0.657826	0.642746	0.637794	0.604734	0.712796	0.887138	0.670427	0.594848	0.680934	0.544974	0.551158	0.531757	1.03394	0.922698	0.689431	0.921185
CD4+ T Cell (Treg)	CD45RO	0.0581218	0.639463	0.921914	0.0581218	3.08263	2.91359	3.23224	2.51213	2.63344	2.76822	2.63025	2.8341	2.94719	2.94479	3.44481	3.0281	3.13406	3.25916	2.97893	2.8909	2.59168	2.62344	3.03224	2.83669	3.24546
CD4+ T Cell (Central Memory)	CD45RA	-0.0951714	0.643149	0.921914	-0.0951714	3.23218	1.36567	1.38787	1.83769	1.59113	1.20973	1.86557	1.97001	2.00079	2.21359	2.38343	1.61254	1.7558	2.22315	1.64234	2.14144	1.14494	1.77611	1.80311	2.14663	1.94556
CD4+ T Cell (Treg)	CD27	-0.0694565	0.645099	0.921914	-0.0694565	5.15819	4.96139	5.18646	4.76867	4.68672	4.89823	4.58499	5.19478	5.21784	5.72587	4.97536	5.165	5.10806	5.19769	5.00712	4.83741	4.77441	5.06731	4.83178	4.18534	5.45721
CD4- CD8- T Cell	CD127	0.121214	0.645222	0.921914	0.121214	4.02562	3.999	4.51358	2.65663	3.32407	4.08774	3.79341	3.7482	3.76456	4.35648	2.07424	3.72515	4.84667	4.12554	3.56502	3.75715	3.59241	3.89813	3.58515	3.65025	3.14259
CD8+ T Cell (Effector Memory)	CXCR5	-0.0752391	0.647363	0.923288	-0.0752391	0.87391	0.70294	2.1314	0.386401	0.547908	0.879453	0.553518	0.946409	0.753402	1.09157	0.728605	0.576467	0.785657	1.11978	0.732475	0.673292	0.645449	0.876921	0.528559	1.02676	1.00545
CD8+ T Cell (Effector Memory)	PD_1	-0.130971	0.64878	0.923627	-0.130971	2.73011	2.66346	2.69258	2.19116	2.93817	2.85626	2.28645	2.51725	2.84325	3.46591	0.477488	2.05218	2.53967	2.89157	3.23825	2.55034	2.57979	1.77967	1.96005	1.41272	2.83343
CD4+ T Cell (Effector Memory)	PD_1	-0.114814	0.650309	0.924124	-0.114814	2.94987	2.53187	2.19411	3.04038	2.74855	2.87739	2.06258	2.45916	2.64929	3.22517	2.88051	2.30834	2.42554	3.35538	2.93934	2.20728	3.07671	1.88979	3.52909	1.00191	3.04475
CD4- CD8- T Cell	CD57	-0.177345	0.654129	0.925335	-0.177345	6.62001	5.55108	6.96361	6.2728	7.43837	6.21184	6.97773	6.33971	5.95535	5.88066	6.98414	7.38418	6.85575	5.19428	7.40084	6.70546	6.38781	5.72423	7.12017	3.45368	6.72314
CD4+ T Cell (EMRA)	CXCR5	0.104388	0.655889	0.925335	0.104388	1.09219	0.707095	0.495405	0.377917	0.49782	1.68696	0.548546	1.73658	0.762544	2.07945	0.977964	0.699496	0.970622	1.32363	0.599977	1.00018	0.7334	1.14258	0.760879	1.62153	2.15746
CD4+ T Cell (Treg)	CD28	0.0538913	0.665982	0.925809	0.0538913	5.23034	4.7824	4.89074	4.6379	4.62047	4.72908	4.74137	4.64996	4.73369	5.40141	4.90828	4.73176	5.13523	5.38436	4.71828	4.65399	4.65521	4.85369	5.03856	4.66451	5.18115
CD8+ T Cell (EMRA)	CD11c	0.191171	0.667689	0.925809	0.191171	4.02036	1.17379	2.67891	1.3685	2.75803	3.00483	0.939612	1.85157	3.47038	1.32558	3.22118	3.25527	2.88084	1.24407	1.05572	3.26492	2.76789	3.40826	2.89506	0.886383	3.71942
CD4+ T Cell (EMRA)	CD45RO	0.10129	0.668021	0.925809	0.10129	3.06109	2.7279	3.42155	2.43441	2.85109	2.69931	2.90631	2.80115	1.9438	1.87537	4.19723	3.15817	3.10156	3.04481	2.63558	2.7996	3.16678	2.52138	3.49121	2.07593	3.12627
CD4- CD8- T Cell	CCR6	0.0764747	0.670558	0.925809	0.0764747	2.74009	1.89179	2.85639	2.01903	2.43523	2.33139	2.34793	2.38101	1.98212	2.38303	2.60305	2.61288	2.71463	2.34383	2.53037	2.04629	2.08838	1.96798	3.46373	1.83016	2.77656
CD4+ T Cell (Treg)	CCR7	0.0677077	0.674069	0.925809	0.0677077	3.50728	4.1654	3.2091	3.87086	3.67027	4.01506	3.56825	3.47557	4.51919	4.57864	4.28226	4.06323	4.0649	4.01982	3.7348	3.54031	4.09845	4.20084	3.89401	4.06481	3.96124
CD8+ T Cell (EMRA)	CD45RA	-0.0705232	0.679456	0.925809	-0.0705232	5.36788	5.00084	5.22695	5.32253	5.47065	4.51222	5.3027	4.95889	5.81895	5.03363	6.01269	5.25275	5.41445	5.53759	4.95084	4.88382	5.02445	5.11001	5.46585	4.65458	5.75309
CD8+ T Cell (Central Memory)	CXCR5	-0.0691092	0.681334	0.925809	-0.0691092	1.04344	0.857552	2.31265	0.793001	0.730948	0.918258	0.591869	1.13313	0.850836	1.31543	1.34758	0.801313	0.877509	1.27896	0.886761	0.807929	0.802215	1.03738	0.999692	1.40473	1.22577
CD8+ T Cell (Central Memory)	CD27	0.0703907	0.683224	0.925809	0.0703907	4.63288	4.75228	4.80168	4.21198	4.36335	4.74017	4.22678	4.90497	4.6538	5.39697	4.11689	4.77521	5.04089	4.88062	4.83931	4.70758	4.5426	4.90496	4.32578	3.7633	5.10707
CD4+ T Cell (Naive)	CD127	-0.0763634	0.68438	0.925809	-0.0763634	4.47892	4.59113	5.10888	4.13214	4.16289	4.41623	3.77475	4.43501	4.21384	5.03138	4.38758	4.07539	5.11762	4.89043	3.99565	4.32476	3.60167	4.55144	4.5797	3.9274	4.4748
CD8+ T Cell (Effector Memory)	CD38	0.147888	0.686679	0.925809	0.147888	4.03211	3.51758	3.67195	4.9658	2.90132	4.14981	2.59646	2.85268	4.18184	2.33147	3.17884	4.89573	3.52737	3.71947	3.94088	3.60153	4.44586	3.17751	3.91451	1.35892	3.78789
CD4+ T Cell (Effector Memory)	CD127	0.0605046	0.687369	0.925809	0.0605046	4.40552	4.78399	4.6727	4.41058	4.08186	4.53009	4.1371	4.41808	4.74877	5.16156	4.34695	4.30146	4.9579	5.16523	4.2845	4.6837	4.02297	4.84386	4.42736	4.49871	4.59863
CD8+ T Cell (EMRA)	CD161	0.154721	0.690143	0.925809	0.154721	2.66785	1.70845	3.36528	1.80693	1.8654	2.41778	1.62319	2.70328	2.66409	3.64652	1.91424	2.2387	4.61228	4.10882	3.17528	2.22614	1.91351	1.50542	2.86159	1.28757	1.60246
CD8+ T Cell (Central Memory)	CD28	0.0646161	0.690417	0.925809	0.0646161	4.52637	4.68611	4.43925	4.49797	4.34164	4.57341	4.1222	4.42424	4.76818	5.42672	4.23677	4.56919	4.70769	5.12323	4.52802	4.44856	4.51562	4.83749	4.85371	3.73043	4.82571
CD4+ T Cell (Naive)	CD25	0.0459437	0.691696	0.925809	0.0459437	1.49288	1.42901	1.86745	1.1292	1.36459	1.49286	1.18852	1.56674	0.960552	1.45847	1.19147	1.58818	1.52301	1.35785	1.46212	1.41644	1.39164	1.38774	1.73448	0.906421	1.45678
CD4+ T Cell (Naive)	HLA_DR	0.147809	0.696154	0.9286	0.147809	2.97589	1.24541	3.72771	0.926243	2.50402	0.794087	3.28805	2.76265	1.27426	1.15626	3.04444	2.57534	1.74718	2.03868	1.00891	2.76429	2.28623	2.87794	2.07085	2.45069	3.20255
CD4+ T Cell (Treg)	HLA_DR	0.0988058	0.698991	0.928619	0.0988058	4.83782	3.41984	4.62298	3.31206	3.42022	2.93404	4.81047	4.09145	3.28178	3.49556	4.28255	3.99324	4.69403	3.48446	4.16602	3.86165	3.74676	3.13633	3.83368	4.62506	4.09116
CD4- CD8- T Cell	PD_1	-0.0798616	0.709385	0.929762	-0.0798616	1.94585	0.847849	2.24395	1.19291	1.20011	2.03344	1.67091	1.57951	0.889341	1.41134	0.50054	1.4309	1.65179	1.49483	1.71097	1.55125	0.999514	0.783863	1.20311	0.593406	1.88696
CD4+ T Cell (Treg)	CD25	0.0552427	0.718604	0.929762	0.0552427	3.80109	3.44337	3.82328	3.23309	3.24576	3.37791	3.293	3.75819	3.4698	3.71235	3.32051	3.73091	3.68605	3.78813	3.5243	3.44953	3.5502	2.72566	4.0761	2.99302	4.00884
CD4+ T Cell (Naive)	CD28	-0.0658503	0.718762	0.929762	-0.0658503	4.82078	4.65806	4.69618	4.11514	4.47186	4.41145	3.98476	4.64354	4.21754	5.40496	4.39794	4.02573	4.85193	5.19884	4.40506	4.50059	4.10895	4.75723	4.46212	3.69886	4.62508
CD4- CD8- T Cell	CCR4	0.0867394	0.720486	0.929762	0.0867394	2.81553	2.19437	3.38725	2.0775	2.30855	2.72598	2.26228	3.34434	2.68229	3.81565	2.28397	1.87728	2.45629	3.87558	3.35342	2.77576	2.50275	2.52549	2.72052	2.87896	3.0811
CD4+ T Cell (Central Memory)	CD28	0.0544991	0.720809	0.929762	0.0544991	4.85785	4.90285	4.5924	4.76138	4.60459	4.65462	4.21501	4.70195	4.6933	5.55593	4.72755	4.67306	5.04728	5.32087	4.7064	4.8141	4.6329	5.02627	4.82987	4.02431	4.98579
CD4+ T Cell (Central Memory)	CD127	0.0530149	0.721129	0.929762	0.0530149	4.50289	4.85269	4.8641	4.61953	4.28997	4.56975	4.04518	4.53508	4.67732	5.21428	4.61339	4.52092	5.16285	5.08924	4.29289	4.7489	4.05155	4.82574	4.8376	4.54875	4.61914
CD4+ T Cell (Effector Memory)	CCR6	-0.0873493	0.736963	0.936407	-0.0873493	2.52919	2.72622	2.85702	2.07205	2.12664	3.00703	2.38133	3.2117	1.86367	3.49587	3.03851	1.68126	2.68472	3.47709	2.91079	1.98189	1.99771	3.27036	2.06517	2.15169	3.5506
CD4- CD8- T Cell	CD28	0.0840197	0.743616	0.936407	0.0840197	4.37411	4.70262	4.79362	3.72455	3.968	4.93708	3.51199	4.36778	4.28816	5.2458	3.0036	4.6235	4.71021	5.26755	4.69203	4.13162	4.53771	3.99786	4.08335	3.48331	3.96515
CD8+ T Cell (Central Memory)	CXCR3	-0.129831	0.745395	0.936407	-0.129831	2.86803	2.63592	3.84325	2.02252	1.73016	3.0751	2.00979	3.62583	1.30975	4.02315	3.26049	0.979156	3.0705	3.62025	2.56947	2.1502	1.21035	3.05888	2.2606	3.49335	3.92891
CD4+ CD8+ T Cell	CCR7	0.077583	0.746537	0.936407	0.077583	3.99321	4.96876	3.01401	4.22676	4.24353	4.82975	3.40207	4.23565	5.15651	5.43391	4.79723	4.39908	4.87127	4.53361	4.50163	4.12356	4.65886	4.36178	4.41558	4.24979	4.57101
CD4+ T Cell (Naive)	CD45RO	-0.0711503	0.746688	0.936407	-0.0711503	2.62974	2.14591	3.39076	0.988431	2.42484	1.94602	2.10732	2.52725	1.85761	1.83777	2.68369	1.78621	2.48028	2.64075	2.14541	2.28382	1.80026	2.23978	2.35563	1.52554	2.33931
CD4+ CD8+ T Cell	CXCR5	-0.071474	0.753004	0.937364	-0.071474	1.54476	1.13149	1.48931	0.726449	0.956766	1.49345	0.75026	2.05701	1.02538	2.17745	2.21232	0.838172	1.07304	2.24233	1.09475	1.14121	0.917814	1.32971	0.997762	1.7677	2.03244
CD8+ T Cell (Effector Memory)	CCR6	0.0658768	0.755806	0.93818	0.0658768	2.45963	2.08957	2.53373	1.50088	1.44342	2.50322	1.89639	2.20335	1.40238	2.65999	2.48643	2.29493	2.66553	2.20178	2.29161	1.41205	1.91254	1.58782	2.64642	1.78944	2.92846
gd T Cell	CD127	0.0811937	0.756055	0.93818	0.0811937	4.21739	4.57944	4.42862	3.47535	3.82402	4.12302	3.59723	4.46153	3.76963	4.97717	3.12125	2.59884	4.79074	5.06278	3.75026	4.35121	3.8287	4.40668	4.20604	4.23439	4.1047
CD8+ T Cell (Effector Memory)	HLA_DR	0.0805536	0.761248	0.939622	0.0805536	3.88339	3.14579	2.9689	4.17624	2.24355	3.65537	3.27901	3.10567	3.27521	3.18352	2.6028	3.89191	3.56863	3.26314	4.05569	3.08172	4.0277	2.73207	3.28453	1.75694	3.43362
CD4+ CD8+ T Cell	CD27	0.0616581	0.764978	0.939622	0.0616581	4.90827	5.37841	4.68502	4.64221	4.84275	5.34557	4.26342	5.44615	5.33257	6.11415	4.81738	5.10277	5.54591	5.34776	5.25962	5.13297	5.0376	5.45162	4.68728	4.1881	5.56831
CD8+ T Cell (EMRA)	HLA_DR	-0.0591414	0.769481	0.939622	-0.0591414	3.44996	2.73801	2.48871	3.92929	2.21991	2.63579	2.78962	2.707	2.15279	3.29144	2.76909	3.17779	3.05267	2.84336	2.31059	2.71287	2.90684	2.75211	2.65785	2.08138	3.25094
CD8+ T Cell (Effector Memory)	CXCR3	0.0970869	0.769838	0.939622	0.0970869	2.17906	1.77578	3.21069	1.2706	1.28603	2.70329	1.6282	3.07363	1.47915	3.59318	2.3725	1.61968	2.20194	3.49077	2.33976	1.6725	1.53192	2.38788	1.6888	2.99091	3.385
CD8+ T Cell (EMRA)	CCR7	0.0654988	0.771298	0.939622	0.0654988	2.70252	1.02876	1.01797	0.971345	1.03799	1.25149	0.608873	0.982687	1.35289	1.10194	1.01265	0.791698	1.27147	1.23186	0.978717	1.32972	0.876018	0.918926	0.867058	2.18374	2.08681
CD8+ T Cell (Central Memory)	CD45RO	-0.0367466	0.77195	0.939622	-0.0367466	2.71333	2.90008	3.02858	2.25106	2.65762	2.88129	2.32935	2.73788	2.65229	2.8488	2.63537	2.7718	3.00487	2.93227	2.63642	2.62647	2.39839	2.49832	2.62751	2.07118	3.00682
CD4+ CD8+ T Cell	CD56_NCAM	0.0829154	0.773528	0.939622	0.0829154	1.14976	0.931464	1.99895	1.99903	1.27414	2.31577	0.872532	2.24147	0.928211	1.61398	1.69295	1.60483	3.21738	0.759163	0.992728	2.78464	0.93882	1.65058	1.67268	1.20896	1.47052
CD4+ T Cell (Central Memory)	CCR6	0.0861136	0.775218	0.939622	0.0861136	2.48163	2.60506	2.96631	1.58535	1.12216	2.41405	2.08026	2.95887	1.35304	3.06131	2.34538	1.29843	2.86728	3.35515	2.95317	1.78798	1.6208	2.82921	1.50099	2.26579	3.08543
CD8+ T Cell (EMRA)	CD38	0.0817359	0.778215	0.939733	0.0817359	3.66954	2.85616	2.95362	4.88254	3.17721	3.83224	2.08721	2.97101	3.11377	2.9227	3.51724	4.4252	3.6694	2.89333	2.38622	3.50707	3.34014	3.51283	3.45048	2.3917	3.95301
CD4+ T Cell (Naive)	CCR4	-0.0910277	0.77891	0.939733	-0.0910277	2.92765	1.60447	3.90488	1.17864	2.77193	2.34424	2.53553	3.59288	1.73433	3.21592	2.6601	1.31718	2.42427	3.92459	2.33842	2.34156	1.9778	2.54899	2.43722	3.00487	2.65716
CD4+ T Cell (Treg)	CXCR3	0.105913	0.781754	0.941713	0.105913	1.8547	1.08186	2.61171	0.848702	1.13152	1.58571	1.40181	2.17497	1.2908	3.34845	3.26251	0.817456	1.5237	2.51078	1.77722	1.37726	0.821685	2.3788	1.81915	3.75767	2.9961
CD8+ T Cell (EMRA)	CCR6	0.0349096	0.786239	0.945661	0.0349096	2.89765	2.64187	3.03665	2.60416	3.03213	2.69538	2.64481	2.99267	2.9241	2.92961	3.12793	3.09735	3.13914	3.17024	2.97298	2.37449	2.77989	2.65938	3.06223	2.38779	3.36646
CD8+ T Cell (EMRA)	CD56_NCAM	-0.0891117	0.792065	0.94741	-0.0891117	1.02819	0.755596	2.4598	1.97613	1.15498	2.96186	1.42395	2.47676	1.34678	2.78094	1.40737	2.25439	3.3641	1.3681	1.05158	2.64364	0.844931	2.02546	1.41663	1.01427	1.10065
CD4- CD8- T Cell	CD161	-0.133751	0.792621	0.94741	-0.133751	3.94738	3.94169	4.8605	0.723389	1.97895	3.93755	3.22769	3.89923	1.44854	3.72949	1.21551	3.46236	4.61572	2.68479	2.87095	3.1515	2.90302	1.37348	1.27976	3.42876	2.81025
CD4- CD8- T Cell	CXCR5	-0.0409222	0.802935	0.952147	-0.0409222	1.01852	0.805179	1.71167	0.544736	0.668884	1.36928	0.465407	1.24654	0.7868	1.39697	1.00482	0.772539	0.825666	1.82785	0.803452	0.70358	0.83683	0.793156	0.940241	1.01266	1.09191
CD8+ T Cell (Central Memory)	CCR6	-0.0669577	0.810773	0.95464	-0.0669577	2.07598	1.88607	1.66075	1.31031	0.813692	1.60673	0.915377	2.09268	0.972579	2.47125	2.42471	1.03475	1.71027	1.41114	1.06028	1.07741	1.00115	1.10469	3.14276	2.07173	2.28909
CD8+ T Cell (Naive)	CD56_NCAM	0.0428421	0.817756	0.955069	0.0428421	0.748215	0.50963	1.21903	0.840734	0.788367	0.818989	0.40446	1.7666	0.694868	0.724195	1.8246	0.965382	0.774145	0.600757	0.707857	0.965863	0.604744	1.25342	1.77784	1.02967	1.14845
CD8+ T Cell (EMRA)	CD57	-0.0473053	0.819277	0.955069	-0.0473053	7.58229	7.29448	7.96349	7.44106	8.05929	7.67571	7.49963	7.95762	7.73602	7.3546	7.91433	8.12752	8.12602	7.00916	7.8556	7.21751	7.72471	7.41276	7.89447	6.41218	8.54569
CD4+ T Cell (Central Memory)	CCR4	0.0465789	0.820896	0.955069	0.0465789	3.27324	3.45376	4.09737	3.82978	3.44707	4.0275	3.39478	4.19968	3.45784	4.85695	3.50701	3.32709	3.86301	4.80902	3.98654	3.62336	3.78754	3.94014	3.4927	3.22215	4.1824
CD4+ CD8+ T Cell	CD127	0.0367593	0.82762	0.957312	0.0367593	4.55023	4.96659	4.90938	4.49063	4.40044	4.79128	4.20112	4.787	4.80717	5.45666	4.55035	4.36078	5.39111	5.35775	4.36334	4.87908	4.15392	4.9536	4.76934	4.52781	4.80257
CD4- CD8- T Cell	CD56_NCAM	0.0485151	0.83147	0.957312	0.0485151	1.38754	1.05199	1.83478	1.66705	1.19431	2.09676	0.921262	2.27196	1.09626	1.86407	1.56811	1.79807	3.05761	1.22838	1.19278	1.9377	1.0166	1.33387	1.76824	1.1769	1.38781
CD8+ T Cell (Naive)	CD127	0.0340318	0.831706	0.957312	0.0340318	4.27096	4.51279	4.76719	4.39274	4.16708	4.3475	3.75781	4.43597	4.57598	4.96427	3.81664	4.25174	4.85978	5.00915	4.15019	4.20989	3.84125	4.54913	4.33558	4.28951	4.48858
CD8+ T Cell (Naive)	CCR6	0.0833147	0.83252	0.957312	0.0833147	1.50402	1.16183	2.15473	1.59101	2.02872	0.958396	1.58392	2.37164	1.35641	1.54532	3.2332	1.33681	1.18002	1.50049	1.32591	1.18449	1.22854	1.50887	5.05653	2.14813	2.08081
CD4+ T Cell (Naive)	CD27	-0.033129	0.832605	0.957312	-0.033129	4.96549	5.08726	5.11328	4.62734	4.83231	5.04058	4.57424	5.31032	5.14957	5.92733	4.93511	5.00833	5.35081	5.21567	5.10178	4.96773	4.73529	5.25538	4.76999	4.36928	5.4061
CD4+ T Cell (Naive)	CD45RA	0.0292175	0.834046	0.957563	0.0292175	5.0687	4.87674	4.84569	4.46889	4.42046	4.37077	4.54283	4.49728	5.17329	5.29289	5.00995	4.87069	4.496	5.11798	4.56849	4.90011	4.5171	4.76663	5.29502	4.83095	4.71785
CD8+ T Cell (EMRA)	PD_1	-0.047831	0.842937	0.963157	-0.047831	2.50823	1.6101	2.11733	1.68402	2.01175	2.45114	1.73104	1.90215	2.35876	3.11487	0.489057	1.56158	2.25756	2.57602	2.11509	2.1495	1.71269	1.95251	1.64415	1.23435	2.29865
CD4+ T Cell (EMRA)	CD57	0.165066	0.843839	0.963157	0.165066	7.52527	7.32747	7.98311	7.51416	7.42883	5.64475	7.58192	7.19955	1.78616	1.71226	8.49736	7.58238	6.72825	6.93423	7.88117	6.53736	7.22956	5.16792	7.87983	3.05377	6.47512
CD8+ T Cell (Naive)	CXCR5	0.0256112	0.857359	0.968532	0.0256112	0.85207	0.758072	1.23534	0.603468	0.767687	0.753728	0.550851	1.01199	0.769165	1.1667	1.80192	0.706506	0.717658	1.11536	0.867121	0.781315	0.720725	0.939689	1.22151	1.3171	1.20639
CD4+ T Cell (Central Memory)	CCR7	-0.0211874	0.867964	0.97088	-0.0211874	3.94245	4.11647	3.85304	4.01327	3.96737	4.10129	3.77422	4.05211	4.72232	4.64167	4.50271	4.24634	4.22389	4.2881	4.20559	3.69967	4.09045	4.0082	4.03126	4.1918	4.33638
CD4- CD8- T Cell	CD27	0.0547832	0.873126	0.973871	0.0547832	4.36885	4.93894	5.48312	2.86139	4.07048	5.38066	3.86356	5.07871	4.6168	5.37319	3.15298	4.97543	5.28191	5.28636	5.21214	3.9462	4.87463	4.06439	3.50298	3.63777	4.48301
CD8+ T Cell (Naive)	CCR7	0.0248263	0.876816	0.975577	0.0248263	4.62961	4.69436	3.6435	4.34385	4.21406	4.45052	3.9183	3.86644	4.79372	4.92838	4.48292	4.40123	4.90405	4.58862	4.3145	4.15468	4.42438	4.11293	3.9633	4.36194	4.62778
CD4+ T Cell (Treg)	CD127	-0.0433127	0.878393	0.975577	-0.0433127	2.23934	2.8075	2.72132	2.90336	2.00623	2.71077	1.87035	2.31069	2.68621	3.12736	2.55938	2.27309	3.03119	3.83664	0.931969	2.13025	2.21779	3.72672	2.5519	1.76416	2.50543
CD4+ T Cell (Naive)	CXCR3	-0.0606885	0.88185	0.976008	-0.0606885	2.57628	1.22582	3.59938	0.679109	1.28152	1.19011	1.22784	2.72277	1.12206	3.24632	2.95917	0.827501	1.56189	2.65875	1.74949	1.48099	0.820958	2.34275	1.40942	3.42796	2.95921
CD4+ T Cell (Treg)	CD45RA	-0.0327807	0.896983	0.985732	-0.0327807	4.6836	4.09539	2.92117	3.88645	3.30283	3.72115	3.04008	3.40051	4.71362	4.53655	4.26581	4.22611	3.24645	3.9149	3.33157	3.74963	3.97771	4.42113	4.57655	2.98386	3.9417
CD4+ T Cell (Effector Memory)	CD294	-0.0439795	0.897018	0.985732	-0.0439795	2.40316	3.18175	0.773652	0.630167	0.719134	2.75239	1.62943	0.738714	0.995756	2.68598	0.814343	2.53105	0.733606	1.48758	1.55353	1.13394	1.89196	1.54831	2.06107	1.26171	1.10697
CD8+ T Cell (Naive)	CD27	0.0190562	0.899041	0.985732	0.0190562	5.08851	4.98585	5.01441	4.80528	4.71545	4.92091	4.5026	5.03171	4.98556	5.59452	4.54288	5.03556	5.28364	5.14462	5.05088	4.94254	4.77337	5.16707	4.33198	4.35684	5.36559
CD4+ T Cell (Treg)	CD161	-0.027528	0.900125	0.985732	-0.027528	2.39491	2.00498	3.25907	2.17136	2.17763	2.56029	1.78149	2.5127	1.77798	2.01575	2.94166	2.08462	3.25365	2.78268	2.49715	2.02791	1.5272	2.2111	2.57255	1.51177	2.52685
CD4+ T Cell (EMRA)	CD45RA	0.01753	0.904085	0.986967	0.01753	4.95157	4.09752	4.48437	4.35925	4.4737	4.2218	4.73784	4.80328	5.00533	5.07663	4.75521	4.58624	4.66956	5.02723	4.67202	4.70793	3.891	4.67658	4.59113	4.78532	4.90146
CD4+ T Cell (Naive)	CCR7	-0.0167186	0.910093	0.986985	-0.0167186	4.577	4.8687	4.25967	4.32399	4.57	4.653	4.18799	4.46631	5.14791	5.44953	5.05449	4.62293	5.02052	4.90422	4.79466	4.35825	4.5703	4.44755	4.58095	4.66615	4.73872
CD4+ CD8+ T Cell	CD45RO	-0.0165895	0.91494	0.988175	-0.0165895	3.11851	2.87932	3.60646	2.57113	2.90902	3.00013	2.70562	3.12348	2.73731	2.97509	3.7888	3.07749	3.28327	3.34511	2.95049	3.06093	2.6711	2.81783	3.09107	2.46678	3.4472
CD4+ T Cell (Central Memory)	CD27	-0.015936	0.918298	0.989033	-0.015936	4.83282	4.92227	4.96803	4.63223	4.64732	4.89254	4.50295	5.18055	5.05023	5.59154	4.81136	4.95953	5.13518	5.03877	5.04865	4.96993	4.70439	5.18904	4.55471	4.0177	5.3426
CD4+ T Cell (Effector Memory)	CD45RO	-0.0130177	0.926403	0.989539	-0.0130177	2.73318	2.71572	3.24511	2.75168	2.72961	2.8632	2.66822	2.75934	2.80026	2.87301	3.97062	2.93315	3.05189	3.14751	2.87729	2.72245	2.7632	2.72186	3.02923	2.6881	3.12601
CD8+ T Cell (Effector Memory)	CD56_NCAM	-0.0259606	0.931777	0.989539	-0.0259606	0.837192	0.935842	0.752753	1.03346	0.659037	2.34055	1.11065	1.23585	0.67899	2.51598	1.28996	1.46389	3.28449	0.584445	0.760722	1.33609	0.72132	1.12129	1.08312	0.721568	0.836429
CD4+ T Cell (Naive)	CD123	-0.0147283	0.933879	0.989539	-0.0147283	1.16404	0.611526	1.51633	0.542183	0.814404	0.563148	2.05826	0.847485	0.965166	0.920447	1.2238	0.947439	0.676793	0.864508	0.593553	1.20572	0.912666	1.72671	1.11805	0.831488	1.18198
CD4+ CD8+ T Cell	CXCR3	0.028701	0.93861	0.990302	0.028701	2.99737	2.32829	3.43792	1.67714	1.99831	2.94696	1.7773	3.58246	1.60497	4.26728	3.37275	1.40528	2.79135	3.56678	2.51021	2.36375	1.71808	3.24821	2.23681	3.85774	3.85312
CD8+ T Cell (Naive)	CD45RA	-0.0111408	0.944563	0.990302	-0.0111408	5.31953	5.1301	4.6992	5.05318	4.65614	4.77615	4.65155	4.58756	5.30087	5.3253	5.92368	5.2589	4.99848	5.28017	4.63943	4.88939	4.6886	5.05908	5.45242	4.79505	5.21184
CD4- CD8- T Cell	HLA_DR	-0.0117908	0.952533	0.991834	-0.0117908	3.03146	2.46521	3.00464	3.29483	2.37478	2.73268	3.20954	2.88778	2.42251	2.48706	2.4988	3.30844	2.67264	3.83923	2.90603	2.79082	2.64514	2.31664	2.54594	1.76728	2.73474
CD8+ T Cell (Naive)	HLA_DR	-0.0183492	0.952722	0.991834	-0.0183492	2.54836	1.93499	2.59802	2.92448	2.46542	1.01014	2.76512	2.77856	1.80688	2.38625	3.84092	3.33374	1.30475	2.07141	1.37558	2.52078	2.43929	2.70401	3.33373	2.12416	3.20826
CD4+ T Cell (Naive)	CCR6	-0.0158324	0.955555	0.992307	-0.0158324	2.28824	1.45928	3.2082	0.884182	1.43095	1.09145	1.5996	2.54833	1.16566	1.58594	2.26205	0.801781	2.00348	2.58632	2.01262	1.21386	0.934474	1.56315	2.44987	2.05821	1.96691
CD4+ T Cell (EMRA)	CCR7	0.0233166	0.966592	0.994238	0.0233166	2.17896	1.00031	0.601649	0.646971	0.778084	3.47181	1.15538	2.89106	4.34407	4.49748	1.16845	1.07891	2.98807	0.769659	0.916491	2.6943	1.09007	3.18969	1.43946	3.46742	3.26657
CD4+ T Cell (Effector Memory)	CCR7	-0.0130252	0.969459	0.994238	-0.0130252	1.97352	0.98562	0.829669	0.937511	0.815787	2.51948	1.69052	2.24492	3.41653	2.54737	0.978643	1.35381	0.806956	0.99309	0.998324	1.8357	2.19164	2.60416	1.32907	2.64389	2.33091
CD8+ T Cell (Central Memory)	CD38	0.012798	0.974051	0.994238	0.012798	3.47345	2.35077	2.05521	4.46498	1.95494	3.68006	2.88419	1.67512	2.88901	2.00162	3.70624	4.53583	3.80914	2.0074	1.92847	2.08164	2.91039	2.66757	3.4198	1.56536	3.50746
CD4+ T Cell (Central Memory)	CXCR3	-0.0132398	0.974307	0.994238	-0.0132398	2.47948	1.98459	3.48107	1.33032	1.38539	1.94935	1.50127	3.15337	1.37528	3.99702	3.04266	1.07328	2.33091	3.39118	2.5005	2.06812	0.922706	2.7349	1.1784	3.56353	3.44935
CD8+ T Cell (Naive)	CXCR3	-0.0105359	0.977105	0.994238	-0.0105359	3.46357	2.57419	3.97499	1.96825	2.16397	3.21397	2.28902	3.73768	1.61457	4.3228	3.52101	1.63358	2.92505	3.8015	3.1615	2.49149	1.76287	3.39852	2.79572	3.66852	4.1141
CD4+ T Cell (Effector Memory)	CXCR3	-0.00807573	0.982145	0.994687	-0.00807573	2.13487	1.25404	2.82306	1.11152	1.12295	2.03308	1.39993	2.98264	1.52438	3.66904	2.60924	0.983735	1.87316	2.98	2.01006	1.81769	0.953062	2.30312	1.29205	3.18012	3.13059
CD4+ CD8+ T Cell	CCR6	0.00172614	0.991659	0.995245	0.00172614	2.82358	2.78526	3.24071	2.68536	3.03035	2.56402	2.47168	3.23784	2.23256	2.9509	3.37755	2.42471	3.02389	3.18351	2.98087	2.46703	2.56734	2.54807	3.31825	2.60368	3.4452
