# Supplementary material for: Single-Cell Immune Profiling and Machine Learning Reveal a Predictive Immune Signature for Immunotherapy Response in NSCLC
Source: Research Square preprint supplement (doi:10.21203/rs.3.rs-8656976/v1), 2026-01-27
Supplement: Supplementary file 2 [file 28d927a11866c4b700690dd2.xlsx]

## Sheet: Hoja1
Supplementary Table 1. Antibodies used for immunophenotyping by mass cytometry.
Antibody (Clone)	Isotope Tag	Conjugation	Source
CD45 (HI30)	89Y	MaxPar Assay	Fluidigm
CD196/CCR6 (G034E3)	141Pr	MaxPar Assay	Fluidigm
CD123 (6H6)	143Nd	MaxPar Assay	Fluidigm
CD19 (HIB19)	144Nd	MaxPar Assay	Fluidigm
CD4 (RPA-T4)	145Nd	MaxPar Assay	Fluidigm
CD8a (RPA-T8)	146Nd	MaxPar Assay	Fluidigm
CD11c (Bu15)	147Sm	MaxPar Assay	Fluidigm
CD16 (3G8)	148Nd	MaxPar Assay	Fluidigm
CD45RO (UCHL1)	149Sm	MaxPar Assay	Fluidigm
CD45RA (HI100)	150Nd	MaxPar Assay	Fluidigm
CD161 (HP-3G10)	151Eu	MaxPar Assay	Fluidigm
CD194/CCR4 (L291H4)	152Sm	MaxPar Assay	Fluidigm
CD25 (BC96)	153Eu	MaxPar Assay	Fluidigm
CD27 (O323)	154Sm	MaxPar Assay	Fluidigm
CD57 (HCD57)	155Gd	MaxPar Assay	Fluidigm
CD183/CXCR3 (G025H7)	156Gd	MaxPar Assay	Fluidigm
CD185/CXCR5 (J252D4)	158Gd	MaxPar Assay	Fluidigm
CD28 (CD28.2)	160Gd	MaxPar Assay	Fluidigm
CD38 (HB-7)	161Dy	MaxPar Assay	Fluidigm
CD56/NCAM (NCAM16.2)	163Dy	MaxPar Assay	Fluidigm
TCRgd (B1)	164Dy	MaxPar Assay	Fluidigm
CD294 (BM16)	166Er	MaxPar Assay	Fluidigm
CD197/CCR7 (G043H7)	167Er	MaxPar Assay	Fluidigm
CD14 (63D3)	168Er	MaxPar Assay	Fluidigm
CTLA-4 (14D3)	169Tm	In-house	eBioscience
CD3 (UCHT1)	170Er	MaxPar Assay	Fluidigm
CD20 (2H7)	171Yb	MaxPar Assay	Fluidigm
CD66b (G10F5)	172Yb	MaxPar Assay	Fluidigm
HLA-DR (LN3)	173Yb	MaxPar Assay	Fluidigm
IgD (IA6-2)	174Yb	MaxPar Assay	Fluidigm
CD279/PD-1 (EH12.2H7)	175Lu	Pre-conjugated	Fluidigm
CD127 (A019D5)	176Yb	MaxPar Assay	Fluidigm
Cell-ID Intercalator-103Rh	103Rh	MaxPar Assay	Fluidigm
