# Supplementary material for: Single-Cell Immune Profiling and Machine Learning Reveal a Predictive Immune Signature for Immunotherapy Response in NSCLC
Source: Research Square preprint supplement (doi:10.21203/rs.3.rs-8656976/v1), 2026-01-27
Supplement: Supplementary file 3 [file 63ee473614019174f3d7bd9d.xlsx]

## Sheet: Hoja3
Supplementary Table 2. Labeling strategies for each of the T cell subsets in the Assignment level of the experiment. Astrolabe follows a hierarchical gating strategy where cells are assigned to increasingly granular subsets. In the table, levels are separated from each other with a comma.
Compartment	Cell Subset	Description
T Cell	gd T Cell	CD3+ CD14- CD19- CD56_NCAM-, TCRgd+
T Cell	CD8+ T Cell (Naive)	CD3+ CD14- CD19- CD56_NCAM-, CD4- CD8a+ TCRgd-, CD45RA+, CCR7+
T Cell	CD8+ T Cell (EMRA)	CD3+ CD14- CD19- CD56_NCAM-, CD4- CD8a+ TCRgd-, CD45RA+, CCR7-
T Cell	CD8+ T Cell (Effector Memory)	CD3+ CD14- CD19- CD56_NCAM-, CD4- CD8a+ TCRgd-, CD45RA-, CCR7-
T Cell	CD8+ T Cell (Central Memory)	CD3+ CD14- CD19- CD56_NCAM-, CD4- CD8a+ TCRgd-, CD45RA-, CCR7+
T Cell	CD4+ T Cell (Treg)	CD3+ CD14- CD19- CD56_NCAM-, CD4+ CD8a- TCRgd-, CD25+ CD127-
T Cell	CD4+ T Cell (Naive)	CD3+ CD14- CD19- CD56_NCAM-, CD4+ CD8a- TCRgd-, (unassigned), CD45RA+, CCR7+
T Cell	CD4+ T Cell (EMRA)	CD3+ CD14- CD19- CD56_NCAM-, CD4+ CD8a- TCRgd-, (unassigned), CD45RA+, CCR7-
T Cell	CD4+ T Cell (Effector Memory)	CD3+ CD14- CD19- CD56_NCAM-, CD4+ CD8a- TCRgd-, (unassigned), CD45RA-, CCR7-
T Cell	CD4+ T Cell (Central Memory)	CD3+ CD14- CD19- CD56_NCAM-, CD4+ CD8a- TCRgd-, (unassigned), CD45RA-, CCR7+
T Cell	CD4+ CD8+ T Cell	CD3+ CD14- CD19- CD56_NCAM-, CD4+ CD8a+ TCRgd-
T Cell	CD4- CD8- T Cell	CD3+ CD14- CD19- CD56_NCAM-, CD4- CD8a- TCRgd-
