# Supplementary material for: Single-Cell Immune Profiling and Machine Learning Reveal a Predictive Immune Signature for Immunotherapy Response in NSCLC
Source: Research Square preprint supplement (doi:10.21203/rs.3.rs-8656976/v1), 2026-01-27
Supplement: Supplementary file 4 [file 6b299df778028dd3ce35f969.xlsx]

## Sheet: MFI_FLOWSOM_Tcells_concatenated
32	152	187	152	152	152	152	185	169	199	152	224	216	329	388	324	226	276	171	259	279	612	735	855	311	487	122	241	175	574	424	160	CD4 EMRA CD57+
32	152	175	154	152	270	152	193	243	262	649	493.5	213	238	331	258	273	178	165	352	505	635	700	773	302	170	151	167	191	153	152	160.5	γδT (p1)
32	152	174	153	155	166	152	196	200	213	157	278	163	197	166	153	386	178	167	440	385	601	716	336	648	168	166	183	172	168	182	155	CD8 EMRA
32	152	191	169	152	187	152	178	205	260	157	316	174	289	399	311	246	152	152	275	461	580	706	859	657	176	122	164	192	182	203	174	CD8 EMRA CD57+
58	219	189	152	167	158	156	267	191	187	171	330	207	257	186	152	299	313	382	590	98	631	736	214	293	321	587	644	608	589	446	448	CD4 Central Memory (p1)
228	174	168	152	152	152	152	215	160	164	152	224	152	184	260	152	305	189	359	255	79	603	713	174	264	280	476	596	614	561	412	542	Treg
41	162	196	152	152	152	152	304	261	176	152	224	152	156	152	152	152	152	191	432	403	651	713	202	279	529	713	558	643	575	163	197	CD4 naive
65	203	186	152	152	152	152	249	182	172	152	224	189	207	224	152	167	185	203	265	83	611	736	186	287	585	600	616	620	590	417	382	CD4 Central Memory (p2)
91	235	241	172	162	184	152	318	272	223	159	236.5	235	287	250	167	207	205	250	385	404	675	769	269	351	613	692	655	683	615	375	433	CD4+ CD8+
32	162	152	152	152	152	152	232	196	152	170	224	152	412	201	160	174	152	152	152	113	597	656	181	474	482	499	454	299	152	214	324	CD4- CD8-
32	154	158	152	152	152	152	246	181	152	152	224	152	261	186	152	152	152	166	252	109	596	657	160	234	499	587	485	247	532	265	271.5	CD4 Central Memory (p3)
36	165	168	152	218	152	180	222	165	165	152	253	189	206	164	152	522	279	373	500	87	599	697	200	262	278	304	572	173	555	426	326	CD4 Effector Memory CD38+HLA-DR+
43	169	188	152	152	152	152	204	157	164	152	224	305	256	308	152	203	236	193	259	89	597	733	187	303	609	213	610	209	595	415	155	CD4 Effector Memory (p1)
97	182	188	152	152	152	152	220	197	166	152	224	181	171	230	152	252	220	224	259	79	583	732	185	292	550	338	625	255	594	412	540	CD4 Effector Memory (p2)
41	215.5	209.5	152	158	177	152	237.5	186	202	152	224	182	368	331	273	316	428	222	323.5	181.5	632	763	712	325	524	508.5	612	615	600	470	371.5	CD4 Effector MemoryCD57+
63	196	258	199	162	243	166	282	266.5	305	191	432	269	341	430	329	267	207	221	407	509	662	779	874	660	542	623	576	620.5	570	368.5	299	CD4+ CD8+ CD57+
32	217	181	152	153	156	152	223	256	208	206	391	152	275	291	187	345	167	321	695	507	613	665	657	221	190	524	618	603	200	156	220	CD4- CD8- CD57+
32	169.5	182.5	288	228.5	515	423	408	267.5	376.5	234	440.5	210	298.5	279	238	423	214	247.5	469	364.5	589	726	507.5	481	209	406	454	447.5	414	356	318.5	Unassigned (p1)
52	197	175	278	207	500	409	411	278	360	194	357	198	279	184	186	372	179	251	425	252	614	738	371	380	566	640	601	629	530	363	367	Unassigned (p2)
48	175	175	152	152	168	152	216	171	219	172	543	616	231	364	152	212	275	182	193	162	608	734	218	679	600	247	602	543	183	360	177	CD8 Effector Memory CD161+
38	171	152	152	156	152	152	257	201	182	578	424	497	346	217	200	315	173	187	204	186	700	752	238	168	563	351	594	554	152	363	170	γδT (p2)
32	167	200	172	152	168	152	289	270	233	152	224	157	313	153	152	157	152	182	295	476	606	704	236	680	555	699	544	654	193	159	215	CD8 naive
35	170	178	154	152	171	152	210	181	226	152	224	162	347	162	180	258	223	182	168	170	587	735	260	696	546	421	567	561	188	339	206	CD8 Effector Memory
91	187	172	155	152	162	152	231	386	222	152	224	154	208	152	152	196	155	197	179	119	572	729	201	677	578	546	621	582	202	350	512	CD8 Central Memory
32	177	181	164	228	187	188	218	174	242	181	320	164	375	167	160	544	412	251	608	141	604	763	289	707	203	261	552	585	191	433	262	CD8 Effector Memory CD38+HLA-DR+
32	175	186	162	152	184	152	202	175	237	152	224	169	325	336	287	354	358	178	226	283	601	751	761	695	379	220	509	562	188	438	226	CD8 Effector Memory CD57+
CD25	CXCR5	CD19	CD123	IgD	CD11c	CD66b	CD14	CD294	CD16	TCRgd	CD56_NCAM	CD161	CXCR3	CCR6	CD20	HLA-DR	PD_1	CTLA_4	CD38	CD45RA	CD3	CD45	CD57	CD8	CD127	CCR7	CD28	CD27	CD4	CD45RO	CCR4

## Sheet: MFI_FLOSOM_Tcells_Nonresponders
32	152	188	152	152	152	152	185	170	194	152	224	237	341	392	327	222	266	168	258	276	620	738	858	307	515	122	229	174	577	428	157	CD4 EMRA CD57+
32	152	175.5	154	152	257	152	192	245	245	643	511	228	232	317.5	254	277	163	160	357	494.5	627	690	762	293	169	163.5	169	178.5	152	152	161	γδT (p1)
32	152	173	155	163	158	152	195	201	198	163	296	163	208	168	159	407	191	163	493	377	604	709	361	624	171	182	186	167	167	178	156	CD8 EMRA
32	152	194	170	152	186	152	179	215	249	155	296	176	286	389	306	254	152	152	292	476	586	702	845	646	176	122	166	185	182	184	171	CD8 EMRA CD57+
60	220	190	152	171	152	160	263	192	188	172	325	205	254	184	152	312	333	375	586	104	629	731	229	292	310	581	644	609	586	446	451	CD4 Central Memory (p1)
223	172	169	152	152	152	152	205	163	164	152	224	152	174	254	152	320	192	345	246	78	598	705	185	259	282	486	589	614	555	403	544	Treg
39	168	199	152	152	152	152	306	265	180	152	224	152	159	152	152	152	152	190	421	413	652	711	207	280	540	721	566	646	575	162	199	CD4 naive
62	203	185	152	152	152	152	246	183	170	152	224	192	201	213	152	169	188	193	257	84	608	729	192	282	579	606	605	617	584	408	377	CD4 Central Memory (p2)
90	240	240	172	163	185	152	318	273	221	160	242	238	295	248	169	207	210	243	374	412	678	767	276	350	616	694	657	686	616	370	433	CD4+ CD8+
32	152	152	152	152	152	152	230	173	152	178	262	156	327	185	156	207	152	155	162	148	576	655	192	423	477	449	467	278	152	233	237	CD4- CD8-
35	152	158	152	152	152	152	243	181	152	152	224	152	193	180	152	155	152	174	253	136	585	658	175	235	521	572	512	235	531	293	228.5	CD4 Central Memory (p3)
37	164	171	152	230	152	175	211	168	155	152	288	194	217	170	152	535	291	354	515	111	596	686	244	254	288	303	555	162	543	414	306	CD4 Effector Memory CD38+HLA-DR+
38	154	185	152	152	152	152	197	160	157	152	224	312	255	238.5	156	216	232	180	246	99	594	729	206	295	590	205	580	172	584	402	152	CD4 Effector Memory (p1)
97	178	189.5	152	152	152	152	212.5	210	163	152	224	199	168	231	152	244	224.5	209	246	83	583.5	724	199	288	554	366	615	241	587	399	532	CD4 Effector Memory (p2)
41	220.5	211.5	152	158	180	152	233.5	190.5	202	152	224	184.5	371	337.5	282	310	422	211	324	222	636.5	763	724	328	529	510	608	612	597	466	367	CD4 Effector MemoryCD57+
63	196	259	194	162	244	169	273	265	305	188	408	287	345	431	328	280	209	216	400	512	664	777	875	656	548	606	576	614	566	368	299	CD4+ CD8+ CD57+
32	215	178	154.5	160.5	155.5	152	222.5	248	206	203.5	396	153	271	304.5	190	344	169	321.5	695	492.5	610.5	663	658	230	195.5	533	620	581.5	200.5	155	215	CD4- CD8- CD57+
35	171	208	261	220	535	295	377	247	339	209	418	190	278	268	222	469	224	257	515	377	591	737	476	569	295	392	384	312	318	371	294	Unassigned (p1)
52	196	212	226	193	485	361	355.5	258	316	176	333	183	237	244	170	349	182	254	431.5	331	630.5	745	302	307	556	674	582	619	563	386	346.5	Unassigned (p2)
47	174	179	155	153	164	152	209.5	180	219.5	175	526	605	254	354	161	231	287	180	184.5	224	609	732	237	674.5	581	263	600	543	180	345	179.5	CD8 Effector Memory CD161+
39	173	152	152	156	152	152	253	208.5	183	578	425	496	352	209	219	326	172	184	195.5	230	703	753	251	169	563	347	599	554	152	358	166	γδT (p2)
32	167	200	170	152	166	152	287	271	225	152	224	156	308	155	152	160	152	179	279	481	610	704	239	671	551	701	547	647	190	160	211	CD8 naive
32	170	181	156	152	172	152	211	180	227	152	224	164	341	164	193	277	241	177	169	187	593	736	285	695	540	423	564	559	188	339	200	CD8 Effector Memory
87	187	171	154	152	162	152	234	398	220	152	224	155	208	152	152	209	162	191	182	113	577	727	204	671	587	556	616	576	198	351.5	513	CD8 Central Memory
32	176	179	160	235	181	194	206	177	242	189	334	165	372	168	162	559	413	227	628	170	606	762	299	700	213	267	541	567	191	418	240	CD8 Effector Memory CD38+HLA-DR+
32	179	186	163	152	184	152	200	180	236	152	224	167	332	337	288	354	358	171	218	314	603	750.5	760	691	408	232	512	560	188	439	221	CD8 Effector Memory CD57+
CD25	CXCR5	CD19	CD123	IgD	CD11c	CD66b	CD14	CD294	CD16	TCRgd	CD56_NCAM	CD161	CXCR3	CCR6	CD20	HLA-DR	PD_1	CTLA_4	CD38	CD45RA	CD3	CD45	CD57	CD8	CD127	CCR7	CD28	CD27	CD4	CD45RO	CCR4

## Sheet: MFI_FLOSOM_Tcells__Responders
32	152	181.5	152	152	152	152	182	165	230	156	361	168	295	378	312	244	328.5	183	263	289	586	725.5	844	335	406	122	320	180.5	565	400	173	CD4 EMRA CD57+
32	152	175	152.5	152	290	152	198.5	241	286	661	476	197	248	348.5	265	266	220	172	338.5	522	645	712	793.5	317	172.5	124.5	160	216	154	171	160	γδT (p1)
32	152	175	152	152	190	152	201	196	253	152	224	163	174	160	152	338	152	177	305	404	594	728	287	676	157	122	177	190	171	195	152	CD8 EMRA
32	152	185	168	152	188	152	177	189	280	159	359	170	295	414	320	233	161	156	251	437	569	712	880	673	175	122	161	206	182	249	180	CD8 EMRA CD57+
57	218	188	152	165	161	152	270.5	191	185	171	331	208	258	188	152	290.5	303	388.5	594.5	95	633.5	740	202.5	293	327	591	643	606	592	447	445	CD4 Central Memory (p1)
230.5	177	167	152	152	152	152	223	157	164	152	224	152	190.5	263.5	152	291.5	187	373	265	79	606	723	166	267	279	470	603	613.5	567	424	539	Treg
44	155	192	152	152	152	152	301	256	170	152	224	152	152	152	152	152	152	193	448	390	649	715	195	279	514	704	548	640	575	163	193	CD4 naive
68	204	188	152	152	152	152	253	180	174	152	224	187	214	236	152	166	182	215	273	82	615	743	179	291	592	594	628	623	597	426	387	CD4 Central Memory (p2)
94	226	245	170	159	181	152	318	270	227	156	224	229	272	252	161	206	198	269	405	390	669	775	256	355	608	690	650	680	613	385	434	CD4+ CD8+
32	167.5	152	152	152	152	152	232.5	202.5	152	167.5	224	152	428	206	161	168	152	152	152	106	602.5	657	178	482	483	508	451	302	152	208	338	CD4- CD8-
32	156	159	152	152	152	152	248	182	152	152	224	152	306	190	152	152	152	162	252	101	602	655	154	234	486	593	472	253	532	252	290	CD4 Central Memory (p3)
36	166	164.5	152	208	152	185	233	162.5	173	152	224	187.5	198	156	152	513.5	268	388.5	490	77	600.5	702	179	268.5	270.5	307	579	182	560.5	433.5	340	CD4 Effector Memory CD38+HLA-DR+
48	180	190	152	152	152	152	211	154	170	152	224	292	257	343	152	193	240	206	270	83	599	736	175	309	626	220	627	270	602	427	165	CD4 Effector Memory (p1)
96	185	187	152	152	152	152	225	189	168	152	224	168	174	228	152	264	216	234	269	76	583	737	176	296	546	313	634	264	600	422	545	CD4 Effector Memory (p2)
40	212	205	152	159	167	152.5	245	177	203	152	224	176.5	364	319.5	252.5	327	451	246	322	143.5	628	764	696	320	505	506.5	622	620.5	604	477	374.5	CD4 Effector MemoryCD57+
64	196	258	204	161	240	160	294	270	304	197	494	247	336	428	330	249	202	229	418	506	660	782	872	668	534	643	576	630	575	370	299	CD4+ CD8+ CD57+
32	219	187	152	152	156	152	225	266	210	211	387	152	277	276	183	346	165	319	693	528	615	668	655	212	184	509	617	619	200	156	228	CD4- CD8- CD57+
32	169	173	292	229	512	437	413	273	386	245	446	215	301	284	241	418	213	245	462	361	589	723	521	468	190	409	464	465	430	352	325	Unassigned (p1)
52.5	198	170	283	210	500	411	417	280	364	197	360	200	284	177	188	374	179	250	425	239.5	613	737	377	386	567	636	604	630	527	361	369	Unassigned (p2)
51	176	170	152	152	172	152	222	163	219	170	555	626	212	373	152	191	264	184	202	135	607	736	200	686	617	235	603	543	185	372	175	CD8 Effector Memory CD161+
36	167	152	152	154	152	152	266	192	179	578	424	501	335	235	170	294	177	191	227	143	696	750	213	168	564	357	586	554	152	377	177	γδT (p2)
32	166	202	173	152	170	152	291	269	240	152	224	157	316	152	152	154	152	184	314	473	602	705	232	691	563	698	538	664	197	157	219	CD8 naive
38	170	172	152	152	171	152	208	182	225	152	224	160	355	159	159	228	199	190	166	152	577	733	226	698	555	420	573	565	188	338	217	CD8 Effector Memory
94	188	172	155	152	162	152	229	380	224	152	224	152	208	152	152	188	152	200	177	123	570	731	199	681	571	538	624	587	205	348	511	CD8 Central Memory
32	178	182	170.5	220	196	181	233.5	168	243	177	309.5	162	381	166	157	529	412	273	598	126	602	764	279	714	194.5	256	560	602.5	189	447.5	278.5	CD8 Effector Memory CD38+HLA-DR+
32	164.5	185	157.5	152	184	152	205	163.5	240	152	224	171	309.5	333.5	280.5	354	359	188.5	250	226	598	751	764	705.5	317	204.5	505	565	189	436	238	CD8 Effector Memory CD57+
CD25	CXCR5	CD19	CD123	IgD	CD11c	CD66b	CD14	CD294	CD16	TCRgd	CD56_NCAM	CD161	CXCR3	CCR6	CD20	HLA-DR	PD_1	CTLA_4	CD38	CD45RA	CD3	CD45	CD57	CD8	CD127	CCR7	CD28	CD27	CD4	CD45RO	CCR4
