# Supplementary material for: Single-Cell Immune Profiling and Machine Learning Reveal a Predictive Immune Signature for Immunotherapy Response in NSCLC
Source: Research Square preprint supplement (doi:10.21203/rs.3.rs-8656976/v1), 2026-01-27
Supplement: Supplementary file 5 [file f035ec31451827be81ddff39.xlsx]

## Sheet: Data
	Supplementary Table 3. Baseline clinicopathological and demographic characteristics of the patients.
	Patient ID	Response	Age (T0)	Gender (M=Male, F=Female)	Histology	PDL1 (%)	Smoker: 2 Ex smoker: 1 Never smoker: 0	Pack/Year	Progression	PFS (days)	Exitus	OS (days)
	IDP0019	PD	75	F	Adeno	0.5	1	40	YES	61	YES	92
	IDP0028	PR	62	F	Adeno	> 60%	1	-	NO	2108	NO	2318
	IDP0032	PD	57	M	Squamous	0.6	2	90	YES	63	YES	100
	IDP0033	PR	67	M	Adeno	0.5	2	90	YES	248	-	-
	IDP0035	PD	66	M	Adeno	0.5	0	0	YES	62	YES	236
	IDP0038	PD	58	M	Squamous	0.8	1	80	YES	57	YES	488
	IDP0043	PR	79	M	Adeno	70-80%	1	55	YES	1354	NO	2147
	IDP0047	PD	65	M	Squamous	60-70%	2	45	YES	72	YES	417
	IDP0050	PD	79	F	Adeno	0.8	0	45	YES	133	YES	680
	IDP0051	PR	69	M	Adeno	0.7	2	54	NO	1958	NO	1985
	IDP0057	PR	63	M	Adeno	0.6	2	100	NO	1812	NO	2063
	IDP0064	PD	77	M	Adeno	0.8	2	59	YES	146	YES	870
	IDP0073	PR	80	M	Adeno	0.9	1	100	NO	211	YES	211
	IDP0074	PD	74	M	Adeno	0.5	2	82	YES	166	YES	284
	IDP0086	PD	67	M	Adeno	0.8	1	-	YES	299	YES	834
	IDP0096	PR	57	M	Adeno	0.8	1	39	NO	1756	NO	1777
	IDP0097	PR	75	M	Adeno	0.9	1	50	NO	1779	NO	1884
	IDP0098	PR	60	M	Adeno	0.8	2	31	NO	1576	NO	1722
	IDP0101	PD	58	M	Adeno	0.5	2	42	YES	148	YES	437
	IDP0111	PR	72	M	Adeno	0.7	1	51	NO	1528	NO	1555
	IDP0117	PD	75	M	Squamous	0.5	1	67	YES	105	YES	177
	PD, progressive disease; PR, partial response
